# Supplementary material for: A Chiral Lanthanide Tag for Stable and Rigid Attachment to Single Cysteine Residues in Proteins for NMR, EPR and Time‐Resolved Luminescence Studies
Source: PubMed Central journal article supplement (PMC8518945; doi:10.1002/chem.202101143), 2021-07-29
Supplement: CHEM-27-13009-s001.pdf [file CHEM-27-13009-s001.pdf]

# Chemistry–A European Journal

Supporting Information

## **A Chiral Lanthanide Tag for Stable and Rigid Attachment to Single Cysteine Residues in Proteins for NMR, EPR and Time-Resolved Luminescence Studies**

Iresha D. Herath, Colum Breen, Sarah H. Hewitt, Thomas R. Berki, Ahmad F. Kassir, Charlotte Dodson, Martyna Judd, Shereen Jabar, Nicholas Cox, Gottfried Otting,\* and Stephen J. Butler\*

## Supporting Information

## Synthesis and characterisation of ligand C12 and corresponding Ln(III) complexes

### Reagents

All chemicals used were purchased from standard chemical suppliers and used without further purification.

### High Performance Liquid Chromatography

Preparative RP-HPLC was performed using a Waters 2489 UV/Visible detector performed at 254 nm, a Waters 1525 Binary HPLC pump controlled by the Waters Breeze 2 HPLC system software. Separation was achieved using a semi-preparative XBridge C18 (5  $\mu$ m OBD 19  $\times$  100 mm) column at a flow rate maintained at 17 mL/min. A solvent system composed of either water (0.05% formic acid) / acetonitrile (0.05% formic acid) or water (25 mM NH<sub>4</sub>HCO<sub>3</sub>) / acetonitrile was used over the stated linear gradient (usually 0 to 100% organic solvent over 10 min). Analytical RP-HPLC was performed using a XBridge C18 (5  $\mu$ m 4.6  $\times$  100 mm) column at a flow rate maintained at 2.0 mL/min using the stated gradient and solvents.

### 2-(Hydroxymethyl)-4-nitropyridine (1)

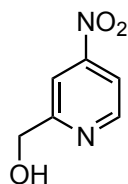

To a solution of 2-methyl-4-nitropyridine-1-oxide (1.00 g, 6.50 mmol) in CH<sub>2</sub>Cl<sub>2</sub> (20 mL) was slowly added trifluoroacetic anhydride (1.90 mL, 13.0 mmol) in CH<sub>2</sub>Cl<sub>2</sub> (3 mL) and the reaction mixture was stirred at room temperature for 72 hours. The solvent was removed under reduced pressure and the resulting yellow oil was dissolved in methanol (10 mL) and saturated K<sub>2</sub>CO<sub>3</sub> solution (5 mL) and stirred at room temperature for 24 hours. The solvent was removed under reduced pressure and the white solid was partitioned between water (30 mL) and ethyl acetate (50 mL) and extracted with ethyl acetate (2  $\times$  50 mL). The combined organic layers were dried over MgSO<sub>4</sub>, filtered and the solvent was removed under reduced pressure. The alcohol **1** was obtained as a pale yellow solid (560 mg, 56%). No further purification was required. <sup>1</sup>H NMR (400 MHz, CDCl<sub>3</sub>)  $\delta$  8.86 (d, *J* = 5.5 Hz, 1H), 8.09 (s, 1H), 7.94 (dd, *J* = 5.5 Hz, 1H), 4.93 (s, 2H), O-H signal not observed. The NMR data are in agreement with those reported previously.<sup>1</sup>

**(S)-2-Bromo-N-(1-phenylethyl)acetamide (3)**

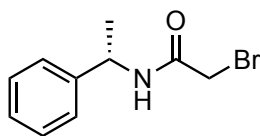

A solution of (*S*)-1-phenylethan-1-amine (6.38 mL, 49.5 mmol) in CH<sub>2</sub>Cl<sub>2</sub> (25 mL) was added dropwise to a solution of bromoacetyl bromide (2.16 mL, 27.8 mmol) in CH<sub>2</sub>Cl<sub>2</sub> (75 mL) at 0 °C under a nitrogen atmosphere. Following complete addition, the reaction was stirred for 2 hours and allowed to equilibrate to room temperature. Then, the reaction mixture was washed with a 2M hydrochloric acid solution (50 mL) followed by brine (50 mL). The organic layer was dried with MgSO<sub>4</sub> and the solvent was removed under reduced pressure to give (*S*)-2-bromo-*N*-(1-phenylethyl)acetamide **3** (5.54 g, 83%) as a white solid. No further purification was required. <sup>1</sup>H NMR (500 MHz, CDCl<sub>3</sub>) δ 7.40–7.25 (m, 5H), 5.08 (d, *J* = 7.0 Hz, 1H), 3.95–3.82 (dd, *J* = 22.9 Hz, *J* = 13.7 Hz, 2H), 1.52 (d, *J* = 7.0 Hz, 3H). <sup>13</sup>C NMR (125 MHz, CDCl<sub>3</sub>) δ: 164.6, 142.4, 128.9, 128.6, 127.7, 126.2, 49.7, 29.4, 21.8. IR(*v*<sub>max</sub>/cm<sup>-1</sup>, neat): 3257, 3060, 2977, 1644, 1543, 1205. HRMS (ESI<sup>+</sup>): calculated for [C<sub>10</sub>H<sub>12</sub>NOBrNa]<sup>+</sup> *m/z* 263.9994, found 263.9995.

**2,2',2''-(1,4,7,10-Tetraazacyclododecane-1,4,7-triyl)tris(*N*-((*S*)-1-phenylethyl)acetamide)  
(4)**

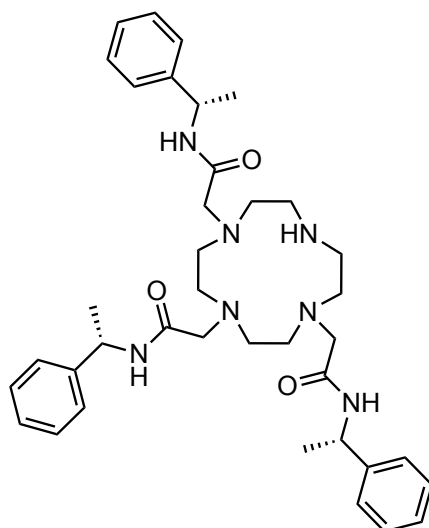

A solution of (*S*)-2-bromo-*N*-(1-phenylethyl)acetamide **3** (0.703 g, 2.90 mmol, 2.5 equiv.) in CH<sub>3</sub>CN (10 mL) was added dropwise to a stirred mixture of cyclen (0.20 g, 1.16 mmol) and NaHCO<sub>3</sub> (0.243 g, 2.90 mmol) in CH<sub>3</sub>CN (50 mL), under a nitrogen atmosphere at room temperature. The reaction mixture was stirred for a further 24 hours, then the solvent was removed under reduced pressure. The residue was dissolved in CH<sub>3</sub>Cl (50 mL) and was transferred to a separating funnel. Water (150 mL) was added, and after vigorous shaking the pH was adjusted to 3. The organic layer was isolated and the aqueous phase was washed with CH<sub>3</sub>Cl (2 x 50 mL). This procedure was repeated at pH 5, 6 and then 7 to isolate the desired product from over-alkylated byproduct. The organic layers containing the desired product (determined by LCMS analysis) were combined, dried over MgSO<sub>4</sub> and the solvent was removed under reduced pressure. The crude material was then purified by column chromatography (silica gel, CH<sub>2</sub>Cl<sub>2</sub>/NH<sub>3</sub> 99.5/0.5, to CH<sub>2</sub>Cl<sub>2</sub>/CH<sub>3</sub>OH/NH<sub>3</sub> 88/12/0.5, in 2% increments) to give compound **4** (0.723 g, 50%) as a pale yellow solid. <sup>1</sup>H NMR (400 MHz, CDCl<sub>3</sub>) δ: 7.50–7.00 (m, 15H), 5.10–4.80 (m, 3H), 3.40–3.00 (m, 6H), 2.70–2.20 (m, 16H), 1.60–1.30 (m, 9H). <sup>13</sup>C NMR (100 MHz, CDCl<sub>3</sub>) δ: 171.7, 171.2, 144.1, 143.9, 128.5, 127.2, 126.7, 126.5, 60.5, 56.9, 55.3, 54.8, 51.9, 50.0, 49.2, 46.5, 22.6, 21.7. IR(*v*<sub>max</sub>/cm<sup>-1</sup>, neat): 3230, 3030, 2980, 1644, 1534, 1448. R<sub>f</sub> (10% CH<sub>3</sub>OH/ CH<sub>2</sub>Cl<sub>2</sub>) = 0.2. HRMS (ESI<sup>+</sup>): calculated for [M+H<sup>+</sup>], [C<sub>38</sub>H<sub>54</sub>O<sub>3</sub>N<sub>7</sub>]<sup>+</sup> *m/z* 656.4283, found 656.4277.

**2,2',2''-(10-((4-Nitropyridin-2-yl)methyl)-1,4,7,10-tetraazacyclododecane-1,4,7-triyl)tris(*N*-((*S*)-1-phenylethyl)acetamide) (C12)**

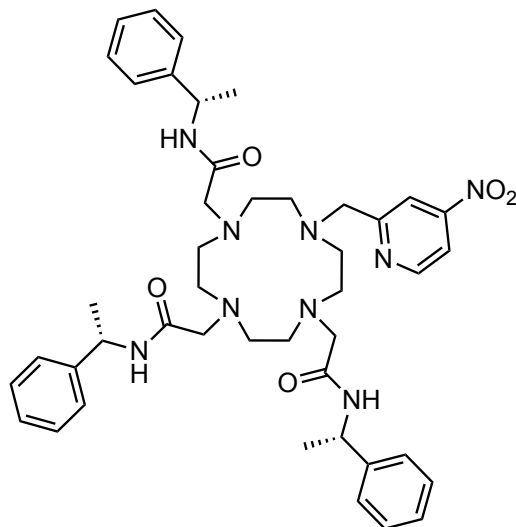

To a solution of alcohol **1** (200 mg, 1.30 mmol) and triethylamine (271  $\mu$ L, 1.95 mmol) in anhydrous THF (10 mL), was added methanesulfonyl chloride (105  $\mu$ L, 1.36 mmol) and the yellow reaction mixture was stirred at room temperature for 1 hour. The solvent was removed under reduced pressure and the crude product was partitioned between  $\text{CH}_2\text{Cl}_2$  (10 mL) and saturated sodium chloride solution (10 mL). The aqueous layer was extracted with  $\text{CH}_2\text{Cl}_2$  (3 x 10 mL), and the combined organic layers were dried over  $\text{MgSO}_4$  and the solvent was removed under reduced pressure. The crude mesylate ester **2** was collected as a yellow oil (280 mg, 93%), which was used immediately in the next step.<sup>1</sup>

To a solution of compound **4** (100 mg, 152  $\mu$ mol) and  $\text{K}_2\text{CO}_3$  (42 mg, 304  $\mu$ mol) in anhydrous  $\text{CH}_3\text{CN}$  (5 mL), was added mesylate ester **2** (41 mg, 175  $\mu$ mol) and the solution was stirred at 60  $^\circ\text{C}$  for 24 hours. The orange solution was cooled to room temperature and centrifugated at 120 rpm for 3 minutes. The solution was decanted, and the solid pellet was washed twice with  $\text{CH}_3\text{CN}$  (10 mL). The combined organic layers were concentrated under reduced pressure and the crude material was purified by column chromatography (silica gel; 100%  $\text{CH}_2\text{Cl}_2$  to  $\text{CH}_2\text{Cl}_2/\text{CH}_3\text{OH}$  90/10) to give the desired ligand **C12** as a white solid (75 mg, 62%).  $^1\text{H}$  NMR (500 MHz,  $\text{CD}_3\text{CN}$ )  $\delta$  7.67 (s, 1H), 7.40–6.98 (m, 17H), 5.06–4.48 (m, 3H), 3.46–3.29 (m, 2H), 2.99–1.99 (m, 20H), 1.44–1.21 (m, 9H).  $^{13}\text{C}$  NMR (125 MHz,  $\text{CD}_3\text{OH}$ )  $\delta$ : 172.3, 172.1, 163.4, 155.5, 152.6, 146.7, 146.0, 129.5, 129.3, 128.1, 127.8, 127.3, 127.1, 126.8, 117.2 (m), 115.5, 59.6, 58.1, 53.6–51.2 (m), 50.5, 22.8, 22.3. IR ( $\nu_{\text{max}}/\text{cm}^{-1}$ , neat): 3192, 3055, 2980, 2824, 1653, 1530, 1444, 1354, 1306, 1232, 1098.  $R_f$  (10%  $\text{CH}_3\text{OH}/\text{CH}_2\text{Cl}_2$ ) = 0.2. HRMS (ESI<sup>+</sup>): calculated for  $[\text{M}+\text{H}^+]$ ,  $[\text{C}_{44}\text{H}_{57}\text{N}_9\text{O}_5]^+$   $m/z$  792.4555, found 792.4554.

## General procedure for the synthesis of Ln.C12

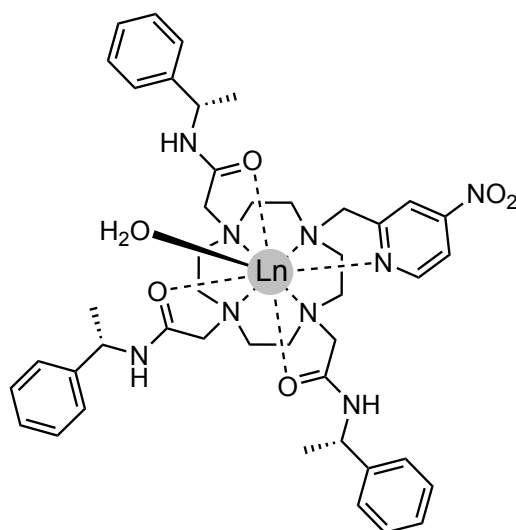

To a solution of ligand **C12** (20 mg, 25.5  $\mu\text{mol}$ ) in  $\text{CH}_3\text{CN}$  (2.5 mL) and water (2.5 mL) was added  $\text{Ln}.\text{Cl}_3.x\text{H}_2\text{O}$  (1.05 equiv.), where  $\text{Ln} = \text{Tb(III)}, \text{Eu(III)}, \text{Tm(III)}, \text{Gd(III)}, \text{Y(III)}$ . The solution was heated to 70  $^\circ\text{C}$  for 2 hours. The organic solvent was removed under reduced pressure and the water was removed by freeze drying. The desired complex **Ln.C12** was obtained as a white solid (24 mg, quant.) in each case. Analytical RP-HPLC analysis [XBridge C18 column, gradient: 0 – 100% acetonitrile in 1% v/v formic acid, over 8 min at 0.7 mL per min] revealed a single peak at approximately  $\text{RT} = 3.0$  minutes, corresponding to the desired Ln(III) complex (see chromatograms below). Retention times (RT) and mass spectral data for each complex are provided in the table below.

| Complex       | RT / min | Formula                                                       | Calculated m/z | Observed m/z |
|---------------|----------|---------------------------------------------------------------|----------------|--------------|
| <b>Tb.C12</b> | 2.96     | $[\text{C}_{44}\text{H}_{54}\text{N}_9\text{O}_5\text{Tb}]^+$ | 948.3574       | 948.3575     |
| <b>Eu.C12</b> | 3.05     | $[\text{C}_{44}\text{H}_{55}\text{N}_9\text{O}_5\text{Eu}]^+$ | 942.3533       | 942.3534     |
| <b>Tm.C12</b> | 3.02     | $[\text{C}_{44}\text{H}_{55}\text{N}_9\text{O}_5\text{Tm}]^+$ | 958.3663       | 958.35       |
| <b>Gd.C12</b> | 3.02     | $[\text{C}_{44}\text{H}_{55}\text{N}_9\text{O}_5\text{Gd}]^-$ | 945.3416       | 945.25       |
| <b>Y.C12</b>  | 2.97     | $[\text{C}_{44}\text{H}_{55}\text{N}_9\text{O}_5\text{Y}]^-$  | 876.3234       | 876.30       |

## Reactivity tests of the Ln.C12 tags

### General procedure for thiol tagging reactions

**Ln.C12** stocks, where Ln = Eu(III) or Tb(III), were made up at 1 mg mL<sup>-1</sup> in water and the pH adjusted to 7.0. Thiol and amino-acid stocks were generally made to 10 or 100 mM in water and the pH adjusted to 7.0. Thiol stocks were prepared fresh each day. **Ln.C12** (250 μM) and thiol (generally 4 mM or stated concentration) in water, pH 7.0 (or stated buffer), were incubated at 37 °C (or stated other temperature) for 18 hours. The reaction mixture was analysed by LCMS and luminescence emission spectra (following dilution of 5 μL into 45 μL 10 mM HEPES, pH 7.0, and using  $\lambda_{\text{exc}} = 280$  nm,  $\lambda_{\text{em}} = 400 - 720$  nm).

### Amino acid selectivity

50 μL of **Tb.C12** (250 μM) and the amino acid(s) (4 mM) in water at pH 7.0 were incubated at 37 °C for 24 hours. 5 μL of the reaction mixture was diluted into 45 μL of 10 mM HEPES at pH 7.0 and emission spectra ( $\lambda_{\text{exc}} = 280$  nm,  $\lambda_{\text{em}} = 400 - 720$  nm) were recorded. In addition, selected reaction mixtures were analysed by LCMS measurements. The selectivity for cysteine was probed in the same way, except that 1.8 μL of 100 mM cysteine (4 mM final concentration) in water at pH 7.0 was added to the reaction mixture.

### General procedure for reaction of Ln.C12 with low-molecular weight thiols

4 mL of **Tb.C12** (500 μM) or **Eu.C12** (500 μM) and the thiol compound (8 mM) in water at pH 7.0 were incubated at 37 °C for 18 hours. The reaction mixture was purified by reverse-phase HPLC (0.1% formic acid, 0 – 100% MeCN/H<sub>2</sub>O) to give the purified thiol-tagged Ln(III) complexes.

### Dilution study with cysteine-tagged Tb.C12

The linearity of the emission intensity ( $\lambda_{\text{exc}} = 280$  nm,  $\lambda_{\text{em}} = 400 - 720$  nm) of pure **Tb.C12-Cys** was probed by a dilution experiment using a 384-well plate in a plate reader to vary the concentration of **Tb.C12-Cys**. The solution was diluted by 60% in each step, starting from a 250 μM solution of **Tb.C12-Cys** in 10 mM HEPES at pH 7.0.

### Glutathione titration with Tb.C12

The sensitivity of the emission response of **Tb.C12** towards glutathione was evaluated by a titration using a 2/3 dilution regime in a 384-well plate to vary the concentration of glutathione.



Experiments were conducted in triplicate as follows. 15  $\mu\text{L}$  of 50 mM Tris-HCl at pH 7.4 was placed into all wells, except for the first well, which contained 45  $\mu\text{L}$  of glutathione (800  $\mu\text{M}$ ). 30  $\mu\text{L}$  was transferred from the first well to the second well, and mixed. This was repeated until the second last well, where the 30  $\mu\text{L}$  was discarded and the last well left without glutathione. Immediately prior to reading, 15  $\mu\text{L}$  of **Tb.C12** (50  $\mu\text{M}$ ) was added to each well and the time-resolved emission intensity recorded every 5 minutes ( $\lambda_{\text{exc}} = 292 - 366 \text{ nm}$ ,  $\lambda_{\text{em}} = 520 - 560 \text{ nm}$ , integration time = 60 – 400  $\mu\text{s}$ ).

### **Glutathione reductase reaction**

A titration using a 2/3 dilution regime in a 384-well plate was used to vary the concentration of glutathione. Experiments were performed in triplicate, including the controls without enzyme, as follows. 20  $\mu\text{L}$  of 50 mM Tris-HCl at pH 7.4 was placed into all wells, except the first well. 60  $\mu\text{L}$  of oxidised glutathione (25 mM) was placed into the first well. 40  $\mu\text{L}$  was transferred from the first well to the second well, and mixed. This was repeated until the second last well, where the 40  $\mu\text{L}$  was discarded and the last well left without oxidised glutathione. 10  $\mu\text{L}$  of a solution containing glutathione reductase (0.03 or 0 U  $\text{mL}^{-1}$ ) and NADPH (3 mM) was added to each well to start the enzyme reaction. The plate was incubated for 30 minutes, after which 10  $\mu\text{L}$  of **Tb.C12** (100  $\mu\text{M}$ ) was added to each well and the plate incubated for 5 minutes. The time-resolved emission intensity was recorded ( $\lambda_{\text{exc}} = 292 - 366 \text{ nm}$ ,  $\lambda_{\text{em}} = 520 - 560 \text{ nm}$ , integration time = 60 – 400  $\mu\text{s}$ ).

The mean of time-resolved emission intensities was calculated, and the no-enzyme control values subtracted from the values with enzyme. The value obtained was multiplied by 4/6 (correction due to volume change and formation of 2 GSH from 1 GSSG) and this was plotted against initial concentration of GSSG, with errors representing the standard errors in the mean. This was fitted to a Michaelis-Menten equation using OriginLab 2019.

## **Production, purification and tagging of proteins**

### **Plasmid constructs**

The ubiquitin S57C construct was designed with a C-terminal Ser-His<sub>6</sub> tag, ERp29 S114C and ERp29 G147C with C-terminal His<sub>6</sub> tag and GB1 with an N-terminal T7 gene 5 tag (coding for MASMTG) and a C-terminal TEV protease cleavage site followed by a His<sub>6</sub> tag. The respective DNA constructs were cloned into the *NdeI* and

*EcoRI* sites of the pET-3a plasmid.<sup>2</sup> The gene of IMP-1 N172C was cloned between the *NdeI* and *XhoI* restriction sites of the pET-47b(+) plasmid.<sup>3</sup> In order to remove the natural cysteine residue of ERp29, the ERp29 mutants also contained the mutation C157S.

### Protein production

All isotope-labelled protein samples were expressed in *E. coli* BL21(DE3) cells.<sup>3</sup> To produce uniformly <sup>15</sup>N-labelled ubiquitin S57C, the cells were grown at 37 °C in Luria–Bertani (LB) medium containing 100 µgL<sup>-1</sup> ampicillin until the OD<sub>600</sub> reached 0.6–0.8 and were then transferred to 300 mL of M9 medium (6 gL<sup>-1</sup> Na<sub>2</sub>HPO<sub>4</sub>, 3 gL<sup>-1</sup> KH<sub>2</sub>PO<sub>4</sub>, 0.5 gL<sup>-1</sup> NaCl) supplemented with 1 gL<sup>-1</sup> of <sup>15</sup>NH<sub>4</sub>Cl. Following induction with isopropyl-β-D-thiogalactopyranoside (IPTG, final concentration 1 mM), the cells were incubated at room temperature for 16 hours. In the case of uniformly <sup>15</sup>N-labelled IMP-1 N172C, 50 µgL<sup>-1</sup> kanamycin was used in place of ampicillin.

Unlabelled ERp29 S114C was produced in *E. coli* BL21(DE3) in 1 L LB medium containing 100 µgL<sup>-1</sup> ampicillin. Cells were grown at 37 °C until the OD<sub>600</sub> reached 0.6–0.8. At this point expression was induced with IPTG and the cells kept at room temperature for 16 hours.

The GB1 mutants Q32C and Q32Sec were produced by cell-free protein synthesis (CFPS) following a previously described protocol.<sup>4</sup> Briefly, continuous exchange CFPS<sup>5,6</sup> was conducted at 30 °C for 16 h, using 1 mL inner reaction mixture and 10 mL outer buffer. The mutant proteins were produced from the PCR-amplified DNA produced with mutation primers and eight-nucleotide single-stranded overhangs to allow cyclization by ligase present in the CFPS reaction.<sup>7</sup> The GB1 Q32C mutant was produced using <sup>15</sup>N-labelled amino acids. GB1 Q32Sec was produced by omitting cysteine and adding 1 mM L-selenocystine at a final concentration of 1 mM. The construct was the same as that published by Welegedara et al. (reference 4) with N- and C-terminal expression tags (full amino acid sequence: MASMTGMTYKLILNGKTLKGETTTEAVDAATAEKVFKCYANDNGVDGEWT YDDATKTFTVTEENLYFQGHHHHH). Selenocystine was reduced to selenocysteine by the presence of 10 mM dithiothreitol (DTT).

Expression of His-tagged Aurora-A kinase in *E. coli* BL21(DE3) cells and purification using IMAC and size-exclusion chromatographies was carried out as previously described.<sup>8,9</sup>

### **Protein purification**

Ubiquitin S57C was purified following a protocol published earlier<sup>10</sup> for purification of His<sub>6</sub>tagged proteins. After purification, the protein was desalted using a HiPrep Desalting 26/10 column (Cytiva, USA) equilibrated with buffer A (50 mM Tris-HCl, pH 8.0, 300 mM sodium chloride, 1 mM DTT) and the His<sub>6</sub> tag was removed by digestion with ubiquitinase<sup>7</sup> for 4 hours at 37 °C.

The same protocol was followed for purification of unlabelled ERp29 except that the His<sub>6</sub> tag was not cleaved off. To purify uniformly <sup>15</sup>N-labelled IMP-1, the protocol was modified by resuspending the cells in buffer B (50 mM HEPES, pH 7.5, 100 μM ZnSO<sub>4</sub>) for lysis by the Avestin Emulsiflex C5. The supernatant of the centrifuged cell lysate was loaded onto a 5 mL SP column, the column was washed with 20 column volumes buffer C (same as buffer B but with 50 mM NaCl) and then the protein was eluted with a gradient of buffer D (same as buffer B but with 1 M NaCl).

The GB1 mutants expressed by CFPS were purified using a 1 mL His GraviTrap column (GE Healthcare Life Sciences, USA) equilibrated with buffer E (50 mM Tris-HCl, pH 7.5, 300 mM NaCl, 5% glycerol, 1 mM DTT), washed with buffer F (same as buffer A but with 20 mM imidazole) and eluted with buffer G (same as buffer A but with 500 mM imidazole).

### **Tagging of cysteine mutants with C12 tags**

To ensure that all cysteine residues were reduced, DTT was added to a 0.1 mM solution of the protein to a final concentration of 4 mM. After incubation for 1 hour, excess DTT was removed using an Amicon ultracentrifugation tube (MWCO 3 kDa) and the buffer exchanged 20 mM HEPES, pH 7.0. The reduced protein was added slowly into 5 equivalents of the C12 tag loaded with the requisite lanthanide ions and dissolved in tagging buffer. The reaction mixtures were left at room temperature overnight with shaking. Completion of the ligation reaction was confirmed by mass spectrometry. The tagged proteins were buffer exchanged either to 20 mM phosphate, pH 6.5, for NMR measurements or to 20 mM MES in D<sub>2</sub>O, 100 mM NaCl, pH 4.9 (uncorrected pH meter reading), for EPR experiments. Perdeuterated glycerol was added to reach a 20% (v/v) final composition for EPR samples.

### **Aurora A tagging with Tb.C12**

All measurements were carried out using the D274N/S278C/C290A/H373C/C393A mutant of Aurora A (residues 122 – 403). This mutant incorporates the D274N (catalytically inactivating) mutation<sup>11</sup> on a pseudo-wildtype construct of Aurora A in which all surface cysteines have been mutated to alanine<sup>12</sup>. S278C and H373C mutations were incorporated for site-specific dye labelling.

Aurora A (D274N/S278C/C290A/H373C/C393A mutant) was passed through a desalting column in buffer E (50 mM Tris-HCl, pH 7.4, 50 mM NaCl) and the concentration of the eluant calculated by UV/vis absorption. 20  $\mu$ L of the protein (15  $\mu$ M) and **Tb.C12** (0, 15, 30, 60 or 120  $\mu$ M) in buffer E with 1.2% DMSO were placed into a 384-well plate in triplicate. The well plate was incubated at 4 °C for 18 hours. The wells were then diluted with 20  $\mu$ L of buffer E. The well plate was read by time-resolved emission ( $\lambda_{exc} = 292 - 366$  nm,  $\lambda_{em} = 515 - 565$  nm, integration time: 60 – 400  $\mu$ s). The triplicate reaction mixtures were combined and emission spectra ( $\lambda_{exc} = 280$  nm) and luminescence lifetime ( $\lambda_{exc} = 280$  nm,  $\lambda_{em} = 545$  nm) were measured.

### **Aurora A reaction with Tb.C12 and AlexaFluor 633**

DiCys Aurora A (D274N/S278C/C290A/H373C/C393A) was passed through a desalting column in buffer E, and the concentration of the eluant calculated by UV/vis absorption. 20  $\mu$ L of the protein (15 or 0  $\mu$ M), **Tb.C12** (120 or 0  $\mu$ M) and Alexafluor 633 (AF633) (0, 15, 30 or 60  $\mu$ M) in buffer E with 1.8% DMSO were placed into a 384-well plate in triplicate. The well plate was incubated at 4 °C for 18 hours. The wells were then diluted with 20  $\mu$ L of buffer E. The well plate was read by time-resolved emission ( $\lambda_{exc} = 292 - 366$  nm,  $\lambda_{em} = 515 - 565$  nm, integration time: 60 – 400  $\mu$ s), and the mean and standard error in the mean calculated. The triplicate reaction mixtures were combined and emission spectra ( $\lambda_{exc} = 280$  nm) and selected luminescence lifetimes ( $\lambda_{exc} = 280$  nm,  $\lambda_{em} = 545$  and 650 nm) were measured.

### Calculation of the critical FRET distance $R_0$

$R_0$  was estimated using

$$R_0 = 0.211 (\kappa^2 J(\lambda) \eta^{-4} \Phi_D)^{1/6} \quad (1)$$

where  $\lambda$  is the wavelength, the orientation factor  $\kappa^2$  was set to 2/3, the refractive index  $\eta$  was set to 1.333, the quantum yield of the donor  $\Phi_D$  was set to the value found for **Tb.C12** conjugated to cysteine (Table 1 in the main text), and the overlap integral  $J(\lambda)$  was calculated using the fluorescence ( $F_D$ ) and absorbance ( $\epsilon_A$ ) spectra in the equation

$$J(\lambda) = \int F_D(\lambda) \epsilon_A(\lambda) \lambda^4 d\lambda \quad (2)$$

The measured absorbance spectrum was converted into extinction coefficients using  $\epsilon_A(632 \text{ nm}) = 239,000 \text{ cm}^{-1}\text{M}^{-1}$ . The uncertainty in  $R_0$  was estimated by propagating values of  $\pm 10\%$  for the experimental values of  $J(\lambda)$  and the refractive index, and  $\pm 15\%$  for  $F_D$ .

FRET efficiency ( $E$ ) was calculated using

$$E = \frac{R_0^6}{r^6 + R_0^6} \quad (3)$$

where  $r$  is the distance between the two fluorophores and  $R_0$  is the critical distance for the dye pair calculated in equation (1).

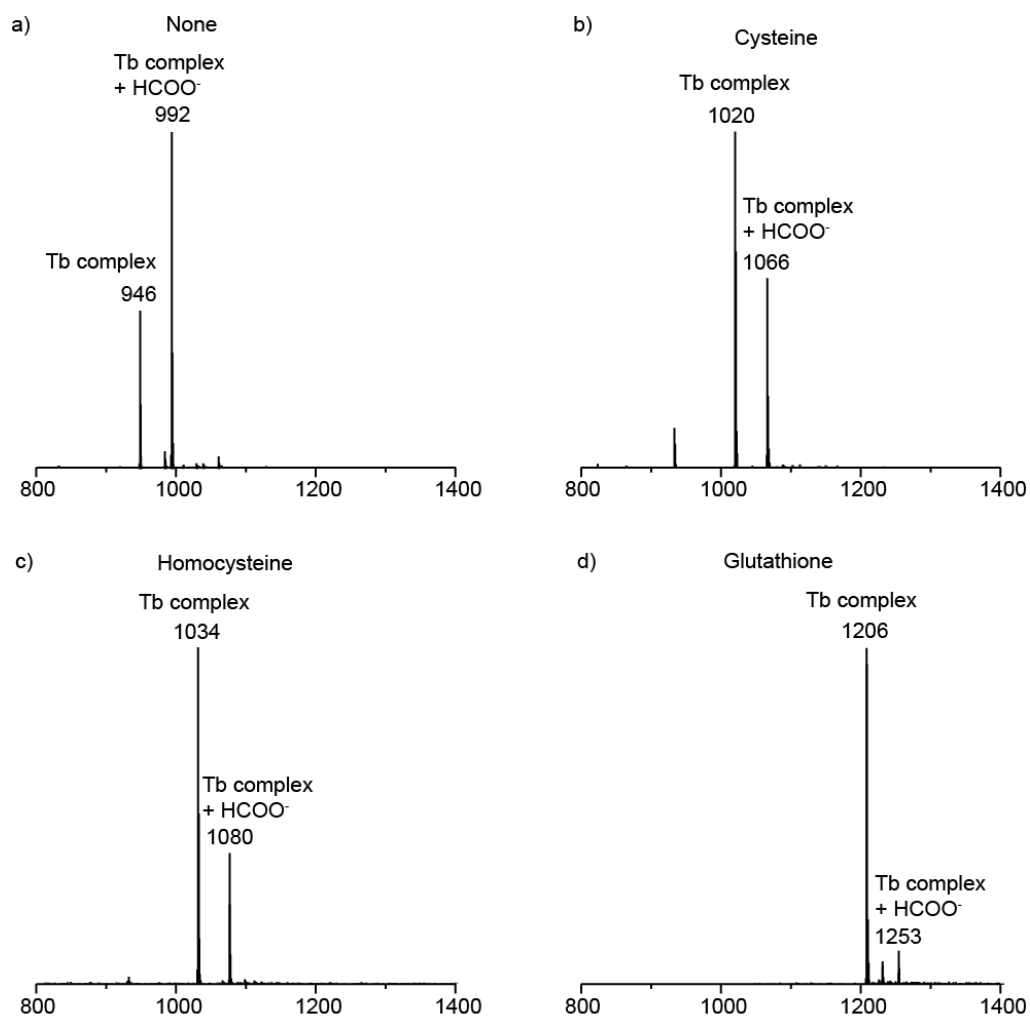

**Figure S1.** Mass spectra (ESI, negative mode) after 16 hour incubation of **Tb.C12** (250  $\mu$ M) with 4 different thiols (4 mM) in water, pH 7.0 at 37°C. (a) Without thiol compound. (b) With cysteine. (c) With homocysteine. (d) With glutathione. Quantitative reaction is indicated by the complete loss of the signal for **Tb.C12** ( $m/z = 946$ ). The major peaks with  $m/z = 1020$ , 1034 and 1206 correspond to the single charged thiol-tagged complexes  $[\mathbf{Tb.C12-Cys} - 4\text{H}]^-$ ,  $[\mathbf{Tb.C12-hCys} - 4\text{H}]^-$  and  $[\mathbf{Tb.C12-GSH} - 4\text{H}]^-$ , respectively.

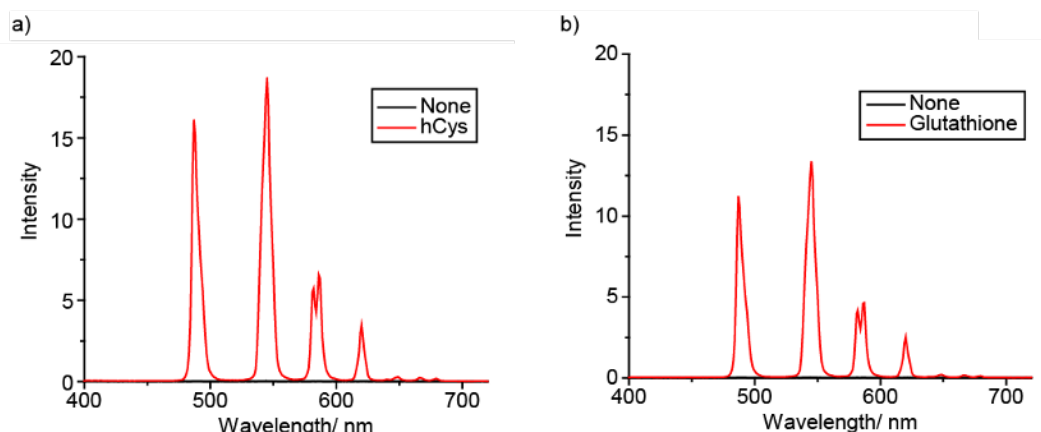

**Figure S2.** Emission spectra after 16 hours incubation of **Tb.C12** (250  $\mu$ M) with (a) homocysteine (4 mM) or (b) glutathione (4 mM), compared to the spectra without thiol addition which sits on the baseline. Incubations in water, pH 7.0 at 37  $^{\circ}$ C, emission spectra ( $\lambda_{\text{exc}} = 280$  nm) recorded after 10-fold dilution into 10 mM HEPES, pH 7.0.

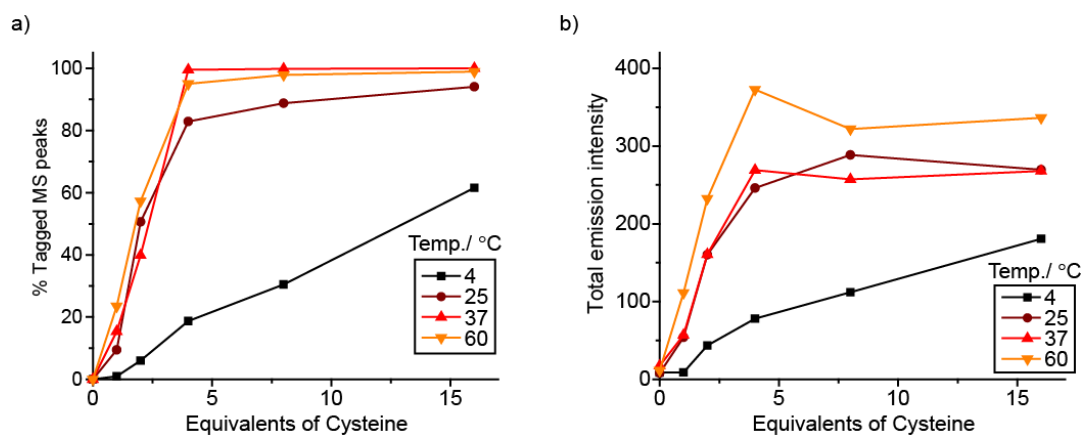

**Figure S3.** Incubation of **Tb.C12** (250  $\mu$ M) with different equivalents of cysteine at different temperatures for 16 hours. Reaction completion monitored by a) mass spectra and b) total emission intensity. Incubations conducted in water at pH 7.0, diluted 10-fold into 10 mM HEPES, pH 7.0, for emission spectra ( $\lambda_{\text{exc}} = 280$  nm). Part a is reproduced from Figure 3a of the main text. Four equivalents of cysteine achieved near-complete reaction. Similar reactivity was observed for the Eu(III) complex of **C12**, albeit with a smaller enhancement in quantum yield upon cysteine tagging (Table 1, Figures S4b and S5).

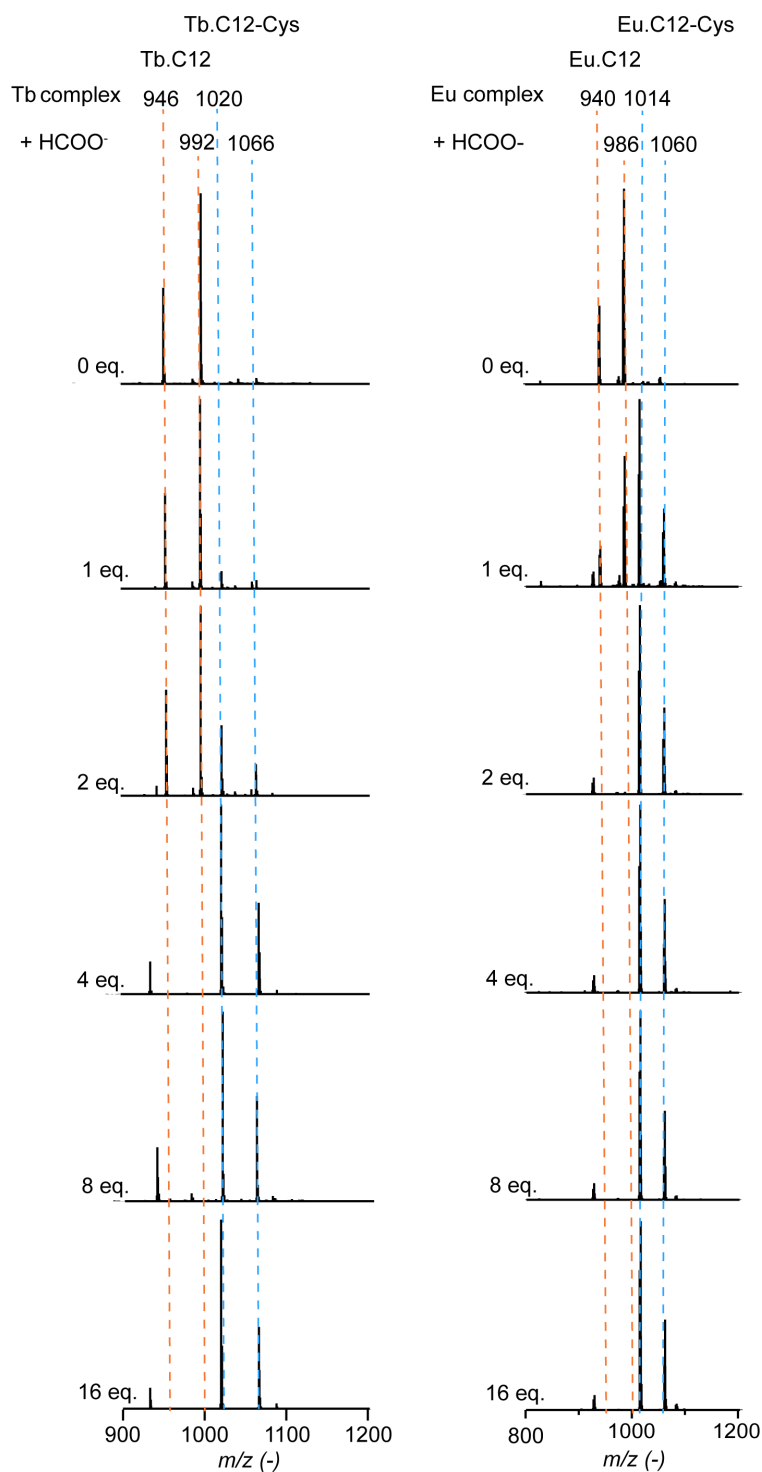

**Figure S4.** Mass spectra (ESI, negative mode) after incubation of **Tb.C12** or **Eu.C12** (250  $\mu$ M) with different equivalents of cysteine at 37  $^{\circ}$ C for 16 hours. Tagging yields were calculated by comparing the intensity of the cysteine-tagged MS peak relative to the untagged peak. (a) Tagging of **Tb.C12**. The m/z values of **Tb.C12-Cys** and untagged **Tb.C12** are 1020 and 946, respectively (the corresponding formate adducts are at m/z = 1066 and 992, respectively) (b) Tagging of **Eu.C12**. The m/z values of **Eu.C12-Cys** and untagged **Eu.C12** are 1014 and 940, respectively (the corresponding formate adducts are at m/z = 1060 and 986).



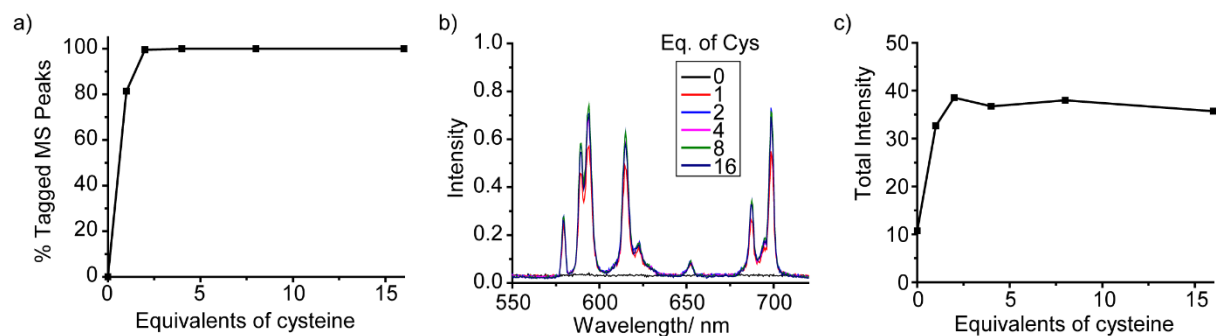

**Figure S5.** Incubation of **Eu.C12** (250  $\mu$ M) with different equivalents of cysteine at 37  $^{\circ}$ C for 16 hours. Reaction completion monitored by a) mass spectra, b) emission spectra and c) total emission intensity. Incubations run in water, pH 7.0, diluted 10-fold into 10 mM HEPES, pH 7.0 for emission spectra ( $\lambda_{exc} = 280$  nm).

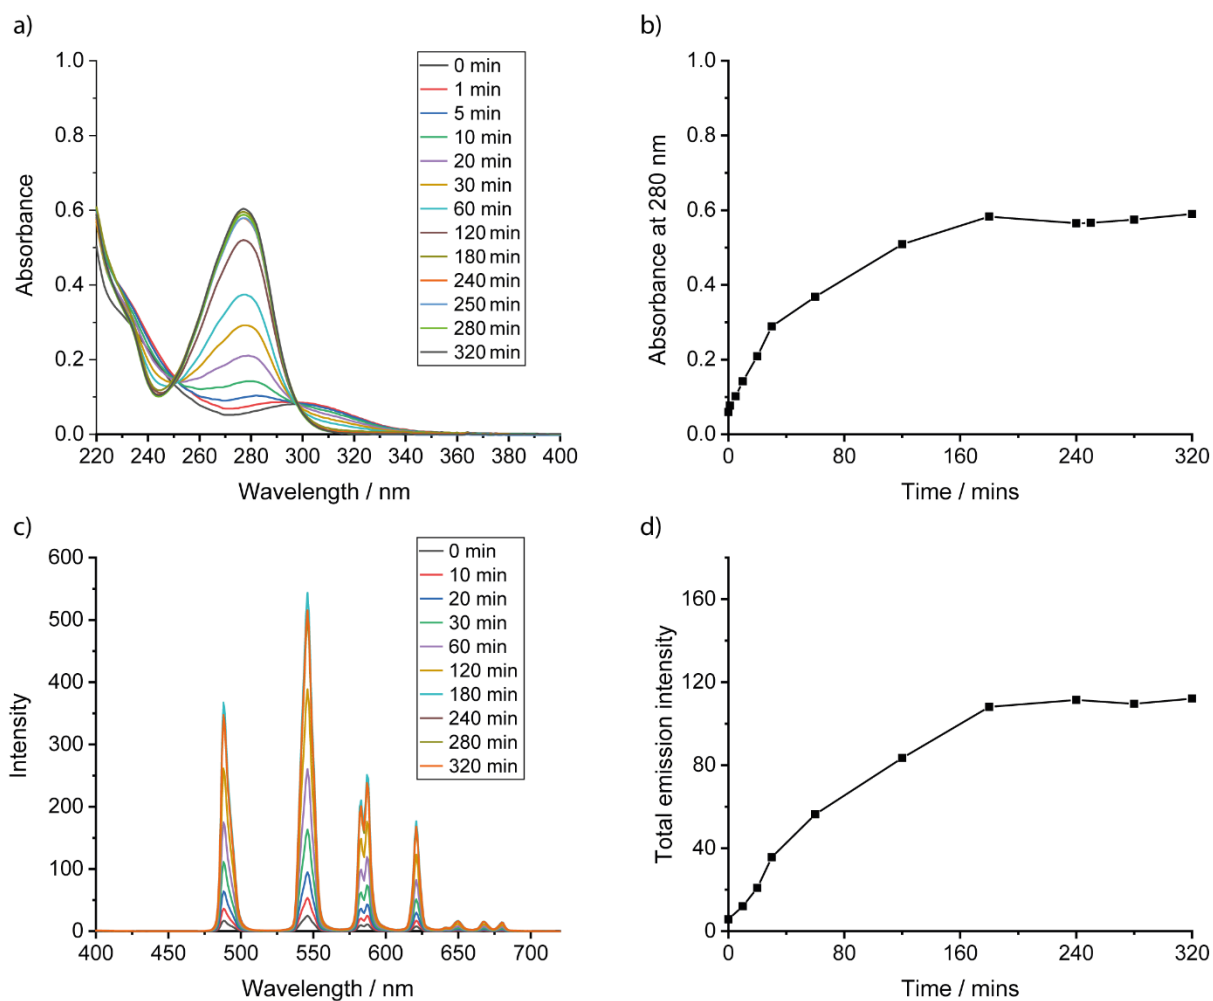

**Figure S6.** Monitoring the reaction between **Tb.C12** and cysteine. (a) Absorption spectra and (b) absorbance at 280 nm of **Tb.C12** (50 μM) recorded as a function of time following incubation with cysteine (8 equiv.) in 10 mM HEPES, pH 7.0, at 37 °C. (c) Emission spectra and (d) total emission intensity of **Tb.C12** (10 μM) recorded as a function of incubation time with cysteine (8 equiv.) at 37 °C in 10 mM HEPES, pH 7.0 ( $\lambda_{exc} = 280$  nm).

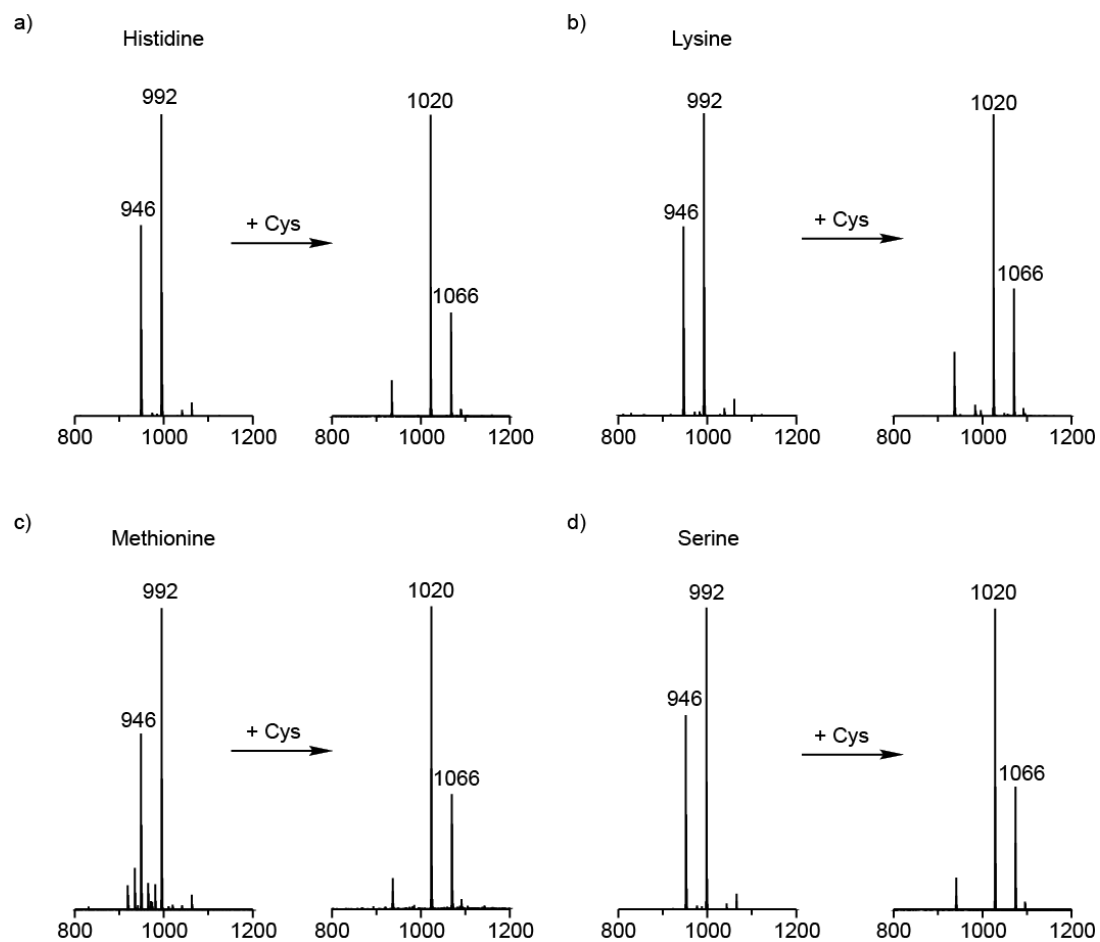

**Figure S7.** Mass spectra after 24 hour incubation of *Tb.C12* (250  $\mu$ M) with a) histidine, b) lysine, c) methionine and d) serine (all 4 mM), followed by addition of cysteine (4 mM) and 24 hour incubation in water, pH 7.0 at 37  $^{\circ}$ C.

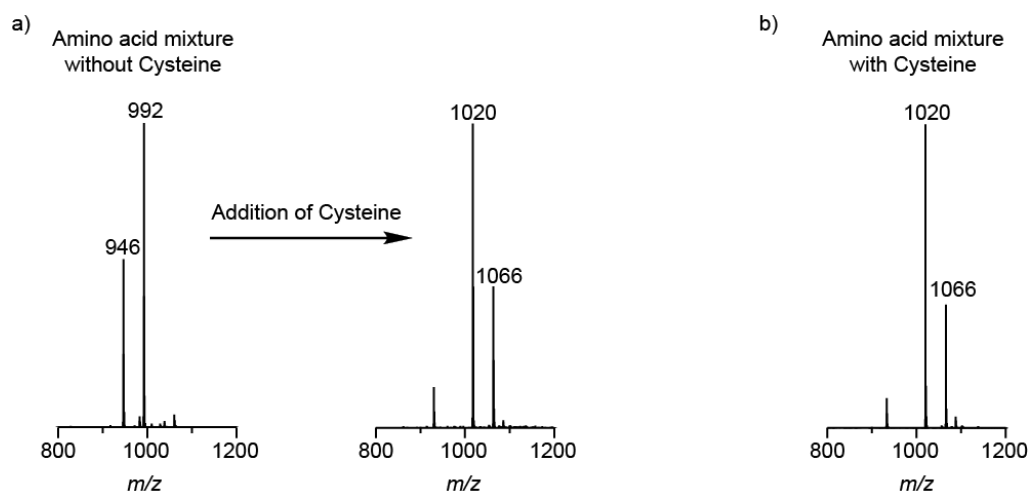

**Figure S8.** Mass spectra after 24 hour incubation of **Tb.C12** (250  $\mu\text{M}$ ) with an amino acid mixture (histidine, arginine, serine, tyrosine, aspartic acid, methionine, asparagine, tryptophan, all 4 mM), with cysteine (4 mM) and without cysteine followed by addition of cysteine (4 mM) and 24 hour incubation in water, pH 7.0, at 37  $^{\circ}\text{C}$ .

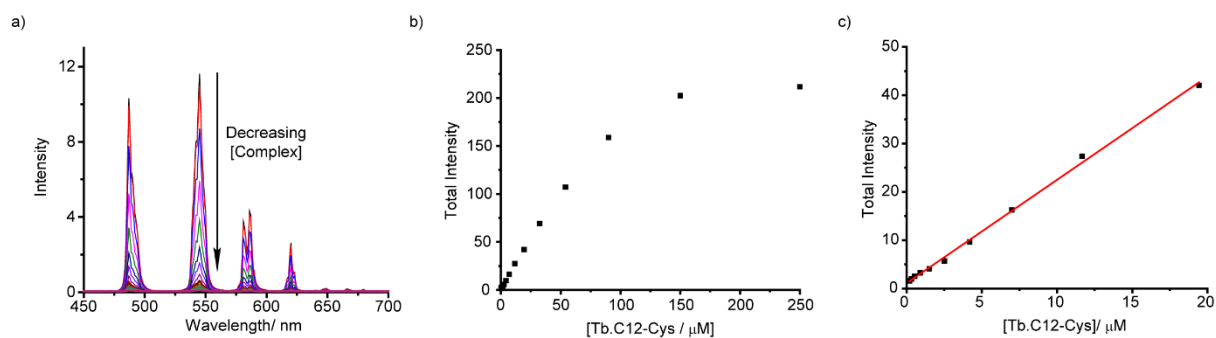

**Figure S9.** Dilution study of **Tb.C12-Cys**. (a) Emission spectra ( $\lambda_{\text{exc}} = 280 \text{ nm}$ ,  $\lambda_{\text{em}} 400 - 720 \text{ nm}$ ) of **Tb.C12-Cys** with decreasing concentration in 10 mM HEPES, pH 7.0. Data measured in a 384-well plate reader. (b) Total emission intensity of the spectra in part a. (c) Total emission intensity of **Tb.C12-Cys** measured in the range 0 – 20  $\mu\text{M}$ .

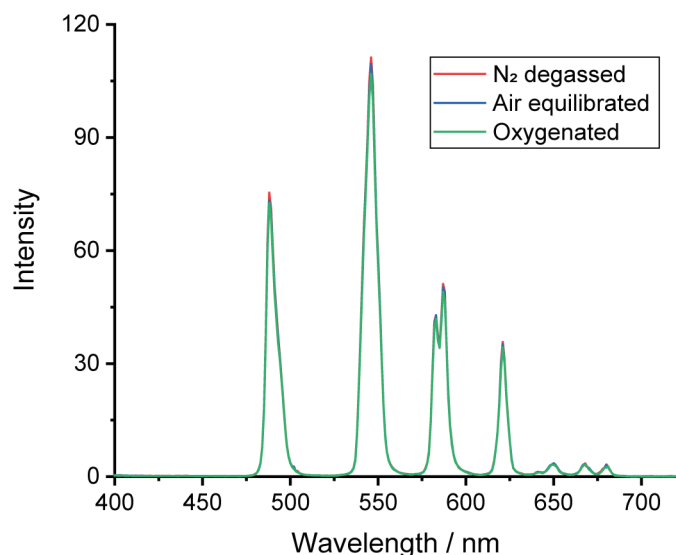

**Figure S10.** Emission intensity ( $\lambda_{\text{exc}} = 280 \text{ nm}$ ,  $\lambda_{\text{em}} = 450 - 720 \text{ nm}$ ) of **Tb.C12-Cys** ( $5 \mu\text{M}$ ) in nitrogen-degassed (5 minutes bubbling), air-equilibrated and oxygenated (5 minutes bubbling) aqueous solution at pH 7. The spectra are indistinguishable within the uncertainty of reproducibility.

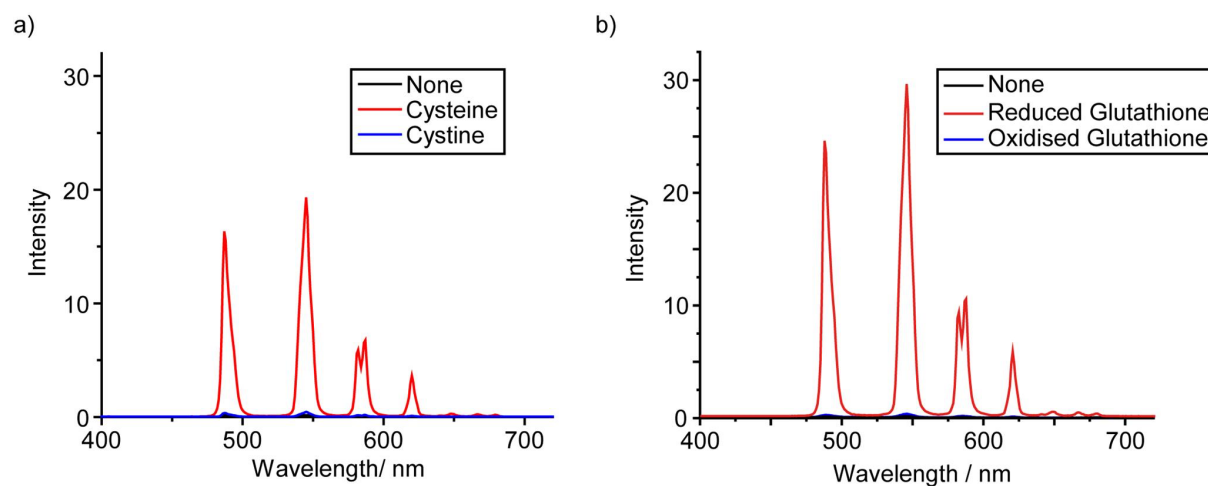

**Figure S11.** Emission spectra after 16 hours incubation of **Tb.C12** ( $250 \mu\text{M}$ ) with cysteine, cystine, GSH or GSSG ( $4 \text{ mM}$ ). Incubations run in water, pH 7.0, at  $37 \text{ }^\circ\text{C}$ . Emission spectra ( $\lambda_{\text{exc}} = 280 \text{ nm}$ ) recorded after 10-fold dilution into  $10 \text{ mM}$  HEPES, pH 7.0. (a) Cysteine/cystine. (b) Glutathione (oxidised/reduced).

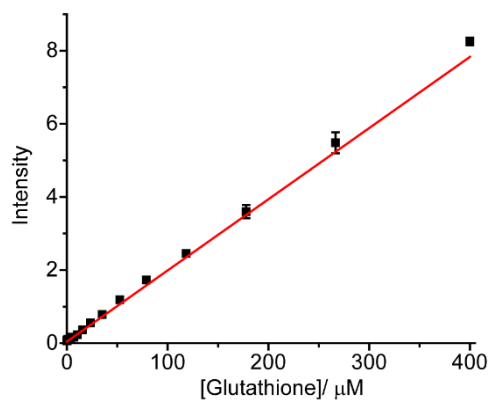

**Figure S12.** Time-resolved luminescence intensity as a function of glutathione concentration. Data measured 5 minutes after addition of **Tb.C12** (25  $\mu\text{M}$  final concentration) to different concentrations of glutathione in 50 mM Tris-HCl, pH 7.4, using  $\lambda_{\text{exc}} = 292 - 366$  nm,  $\lambda_{\text{em}} = 510 - 500$  nm and an integration time from 60 to 400  $\mu\text{s}$ .

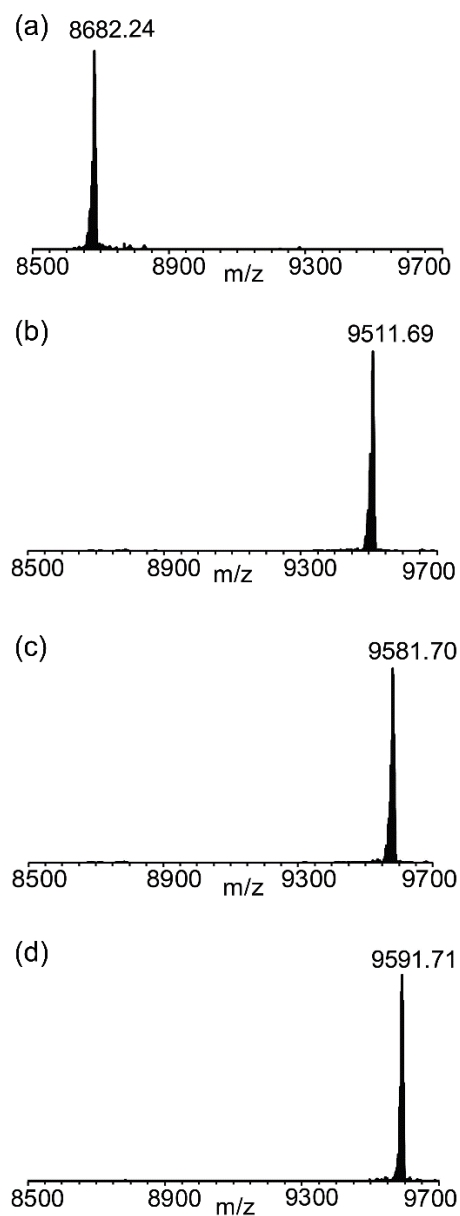

**Figure S13.** Mass spectra showing complete tagging of uniformly  $^{15}\text{N}$ -labelled ubiquitin S57C with the **C12** tag loaded with different lanthanides. (a) Protein without tag. (b) After tagging with **Y.C12**. The expected mass increase is 832.34 Da to 9514.58 Da. (c) After tagging with **Tb.C12**. The expected mass increase is 902.36 Da to 9584.60 Da. (d) After tagging with **Tm.C12**. The expected mass increase is 912.39 Da to 9594.63 Da.

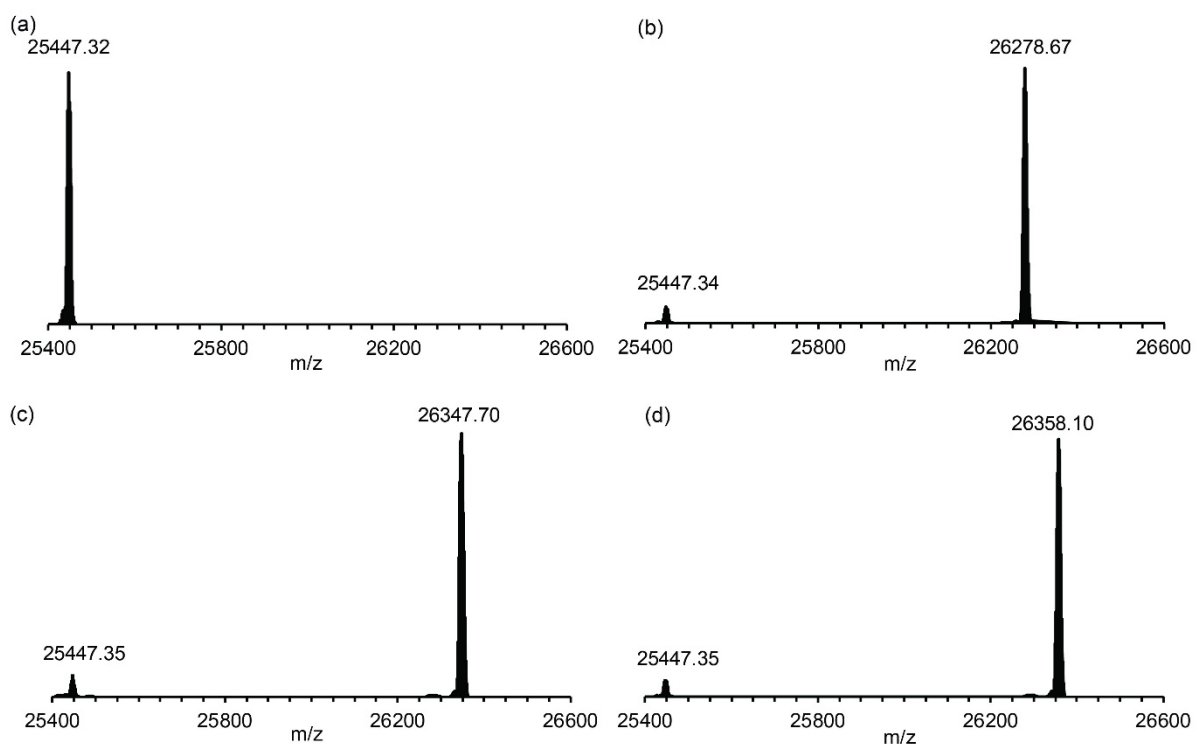

**Figure S14.** Mass spectra showing complete tagging of uniformly  $^{15}\text{N}$ -labelled IMP1 N172C with the C12 tag loaded with different lanthanoids. (a) Protein without tag. (b) After tagging with C12- $\text{Y}^{3+}$ . The expected mass increase is 831.86 Da to 26279.18 Da. (c) After tagging with C12- $\text{Tb}^{3+}$ . The expected mass increase is 901.88 Da to 26349.2 Da. (d) After tagging with C12- $\text{Tm}^{3+}$ . The expected mass increase is 912.40 Da to 26359.72 Da.



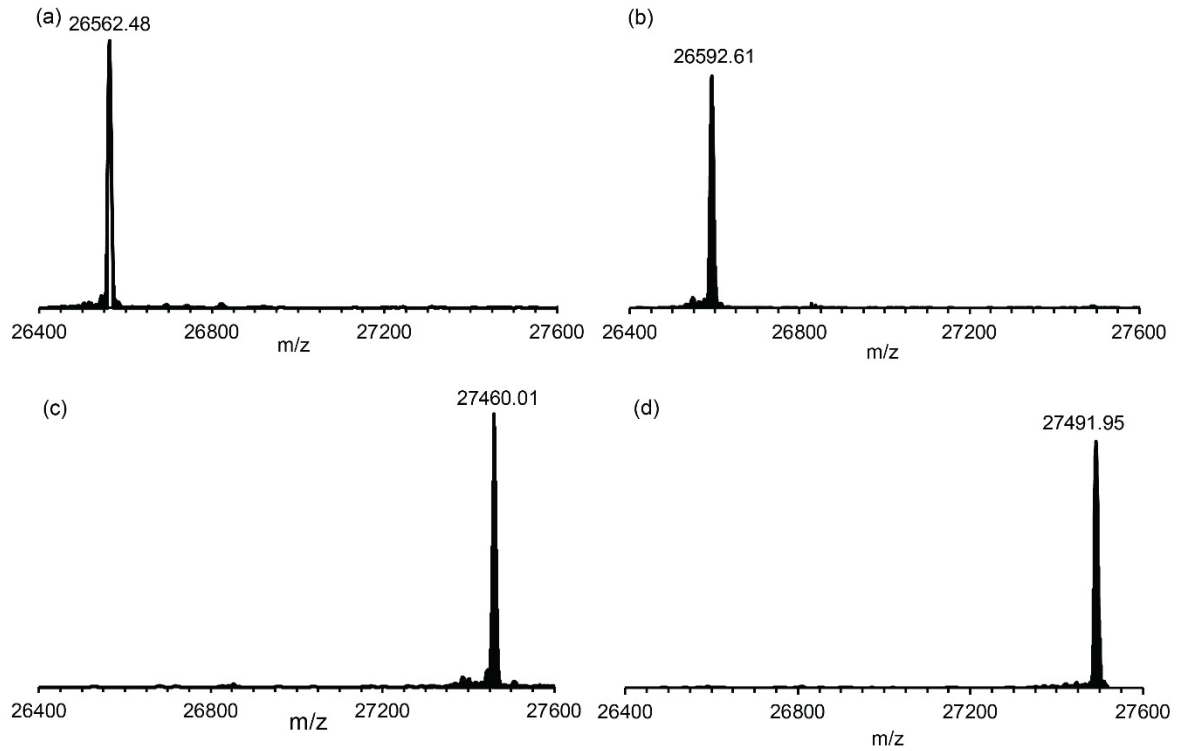

**Figure S15.** Mass spectra showing complete tagging of ERp29 S114C and G147C mutants with the **Gd.C12** tag. All ERp29 samples also contained the mutant C157S to remove the single naturally occurring cysteine residue in the protein. (a) ERp29 S114C without tag. The calculated mass is 26,561.94 Da. (b) ERp29 G147C without tag. The calculated mass is 26,591.96 Da. (c) Same as part a, but after tagging with **Gd.C12**. Calculated mass 27,462.14 Da. (d) Same as part b, but after tagging with **Gd.C12**. The calculated mass is 27,492.16 Da.

**Table S1.** Pseudocontact shifts measured in ppm for backbone amide protons of ubiquitin S57C ligated with **Tb.C12** or **Tm.C12**.

| Residue | PCS with<br>Tb <sup>3+</sup> | PCS with<br>Tm <sup>3+</sup> |
|---------|------------------------------|------------------------------|
| Gln 2   | -0.248                       | 0.137                        |
| Ile 3   | -0.225                       | 0.142                        |
| Val 5   | 0.017                        | -0.014                       |
| Lys 6   | 0.178                        | -0.107                       |
| Thr 7   | 0.092                        | -0.056                       |
| Leu 8   | 0.124                        | -0.074                       |
| Thr 9   | 0.085                        | -0.046                       |
| Lys 11  | 0.053                        | -0.034                       |
| Thr 12  | 0.017                        |                              |
| Ile 13  | 0.013                        |                              |
| Thr 14  | -0.099                       | 0.072                        |
| Leu 15  | -0.185                       | 0.114                        |
| Val 17  | -0.587                       | 0.519                        |
| Lys 29  | -0.554                       | 0.421                        |
| Ile 30  | -0.323                       | 0.252                        |
| Asp 32  | -0.276                       | 0.216                        |
| Lys 33  | -0.218                       | 0.169                        |
| Glu 34  | -0.141                       | 0.111                        |
| Gly 35  | -0.131                       | 0.110                        |
| Ile 36  | -0.092                       | 0.089                        |
| Asp 39  | -0.089                       | 0.095                        |
| Gln 40  | -0.015                       | 0.040                        |
| Gln 41  | 0.027                        | 0.012                        |
| Leu 43  | 0.467                        |                              |
| Ile 44  | 0.510                        | -0.277                       |
| Phe 45  | 1.129                        | -0.663                       |
| Ala 46  | 0.820                        | -0.536                       |
| Gly 47  | 0.766                        | -0.488                       |
| Leu 50  | 1.030                        | -0.547                       |
| Arg 54  | -0.390                       |                              |
| Lys 63  | -0.100                       |                              |
| Glu 64  | -0.029                       | -0.054                       |
| Ser 65  | 0.167                        | -0.190                       |
| Thr 66  | 0.386                        | -0.294                       |
| Leu 67  | 0.258                        | -0.178                       |
| His 68  | 0.448                        | -0.260                       |
| Val 70  | 0.237                        | -0.131                       |
| Leu 71  | 0.148                        | -0.073                       |
| Arg 72  | 0.132                        | -0.055                       |
| Leu 73  | 0.140                        | -0.078                       |
| Arg 74  | 0.078                        | -0.040                       |
| Gly 75  | 0.089                        | -0.056                       |
| Gly 76  | 0.117                        | -0.058                       |

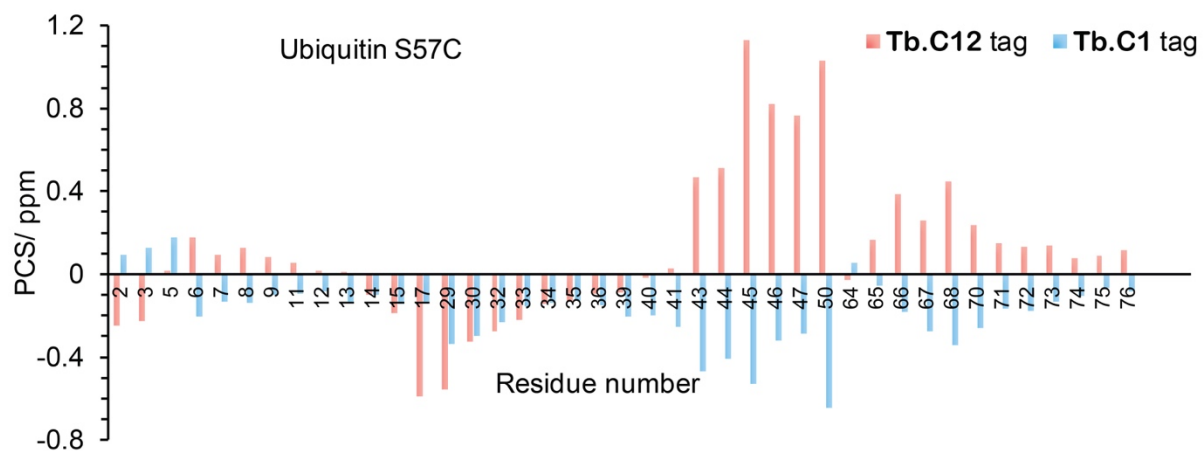

**Figure S16.** PCSs measured for backbone amide protons of ubiquitin S57C with **Tb.C12** and **Tb.C1** tags<sup>10</sup> versus the amino acid sequence.

**Table S2.** Pseudocontact shifts measured in ppm for backbone amide protons of IMP-1 N172C ligated with **Tb.C12** or **Tm.C12** tags.

| Residue | PCS with<br>Tb <sup>3+</sup> | PCS with<br>Tm <sup>3+</sup> |
|---------|------------------------------|------------------------------|
| Lys 8   | 0.110                        | -0.097                       |
| Leu 12  | 0.013                        | -0.017                       |
| Glu 14  |                              | -0.009                       |
| Gly 15  | 0.011                        | -0.013                       |
| Val 18  | 0.022                        | -0.06                        |
| Thr 20  | 0.106                        | -0.097                       |
| His 34  |                              | -0.093                       |
| Gly 35  | 0.095                        | -0.113                       |
| Leu 36  | 0.031                        | -0.078                       |
| Val 37  | 0.028                        | -0.058                       |
| Asp 48  | 0.074                        | -0.124                       |
| Val 64  | 0.061                        | -0.041                       |
| Gly 67  | 0.026                        | -0.04                        |
| Ile 70  | 0.047                        | -0.05                        |
| Gly 72  | 0.001                        | -0.04                        |
| Ser 76  | 0.045                        | -0.14                        |
| Asn 90  | 0.172                        | -0.129                       |
| Arg 92  | 0.117                        | -0.084                       |
| Ser 93  | 0.051                        | -0.057                       |
| Ile 94  | 0.065                        | -0.051                       |
| Ser 99  | -0.249                       | 0.159                        |
| Gly 110 | -0.002                       | -0.016                       |
| Phe 118 | -0.235                       | 0.206                        |
| Gly 120 | -0.011                       | 0.043                        |
| Leu 125 | -0.076                       | 0.05                         |
| Asn 128 | -0.058                       | 0.018                        |
| Lys 129 | -0.053                       | 0.02                         |
| Ile 130 | -0.040                       | 0.037                        |
| Glu 131 | -0.075                       | 0.041                        |
| Val 145 | -0.288                       | 0.156                        |
| Trp 147 | -0.117                       | 0.063                        |
| Leu 148 | -0.049                       | 0.01                         |
| Ile 153 | -0.057                       | 0.013                        |
| Lys 189 | -0.073                       |                              |

**Table S3.** PCSs measured in ppm for backbone amide protons of IMP-1 N172C ligated with **Tb.C2** or **Tm.C2** tags.

| Residue | PCS with<br>Tb <sup>3+</sup> | PCS with<br>Tm <sup>3+</sup> |
|---------|------------------------------|------------------------------|
| Leu 4   | -0.135                       | 0.102                        |
| Lys 8   | -0.148                       | 0.120                        |
| Glu 10  | -0.106                       | 0.083                        |
| Leu 12  | -0.069                       | 0.061                        |
| Glu 14  | -0.042                       | 0.033                        |
| Gly 15  | -0.030                       | 0.025                        |
| Tyr 17  | -0.066                       | 0.058                        |
| Val 18  | -0.103                       | 0.081                        |
| His 19  | -0.155                       | 0.125                        |
| Thr 20  | -0.162                       | 0.127                        |
| Phe 22  | -0.231                       | 0.178                        |
| Glu 24  | -0.294                       | 0.219                        |
| Val 25  | -0.417                       | 0.310                        |
| Val 31  | -0.389                       | 0.291                        |
| Gly 35  | -0.222                       | 0.178                        |
| Val 37  | -0.158                       | 0.135                        |
| Val 40  | -0.094                       | 0.078                        |
| Tyr 45  | -0.025                       | 0.023                        |
| Leu 46  | -0.031                       | 0.034                        |
| Ile 47  | -0.098                       | 0.088                        |
| Asp 48  | -0.143                       | 0.125                        |
| Thr 49  | -0.210                       | 0.177                        |
| Thr 52  | -0.170                       | 0.136                        |
| Asp 55  | -0.099                       | 0.079                        |
| Thr 61  | -0.041                       | 0.033                        |
| Val 64  | -0.026                       | 0.022                        |
| Arg 66  | -0.026                       | 0.017                        |
| Ile 74  | -0.051                       | 0.054                        |
| Ser 76  | -0.283                       | 0.247                        |
| His 77  | -0.465                       | 0.409                        |
| Ser 82  | -0.537                       | 0.435                        |
| Thr 83  | -0.373                       | 0.302                        |
| Gly 84  | -0.256                       | 0.212                        |
| Gly 85  | -0.138                       | 0.119                        |
| Asn 90  | 0.042                        | -0.030                       |
| Arg 92  | 0.037                        | -0.028                       |
| Ser 93  | 0.051                        | -0.039                       |
| Ile 94  | 0.038                        | -0.025                       |
| Ala 114 | 0.174                        | -0.123                       |
| Ser 117 | 0.234                        | -0.182                       |
| Phe 118 | 0.297                        | -0.225                       |
| Ser 119 | 0.354                        | -0.266                       |
| Tyr 123 | 0.190                        | -0.131                       |
| Trp 124 | 0.145                        | -0.106                       |

|         |        |        |
|---------|--------|--------|
| Leu 125 | 0.076  | -0.052 |
| Asn 128 | 0.067  | -0.048 |
| Lys 129 | 0.044  | -0.029 |
| Ile 130 | 0.040  | -0.026 |
| Glu 131 | 0.030  | -0.016 |
| Val 132 | 0.102  | -0.069 |
| Phe 133 | 0.070  | -0.028 |
| Tyr 134 | 0.320  | -0.217 |
| Val 144 | -0.351 | 0.336  |
| Val 145 | -0.025 | 0.059  |
| Leu 148 | -0.018 | 0.025  |
| Ile 153 | -0.032 | 0.030  |
| Leu 154 | -0.080 | 0.073  |
| Ala 180 | 0.167  | -0.092 |
| Gly 188 | 0.053  | -0.035 |
| Lys 189 | 0.031  | -0.016 |
| Lys 191 | -0.036 | 0.027  |
| Leu 192 | -0.062 | 0.053  |
| Val 194 | -0.174 | 0.145  |
| Gly 201 | -0.176 | 0.141  |
| Ser 204 | -0.089 | 0.073  |
| Leu 210 | -0.158 | 0.134  |
| Glu 211 | -0.148 | 0.118  |
| Ala 213 | -0.355 | 0.281  |
| Gly 216 | -0.454 | 0.354  |

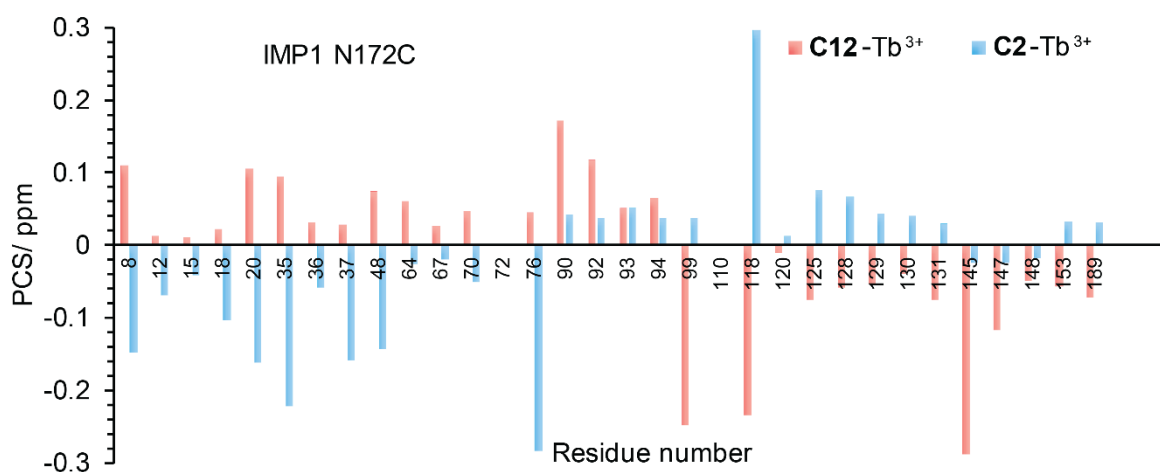

**Figure S17.** Plots of the PCSs measured for backbone amide protons of IMP1 N172C with **Tb.C12** tag and **Tb.C2** tag versus the amino acid sequence.

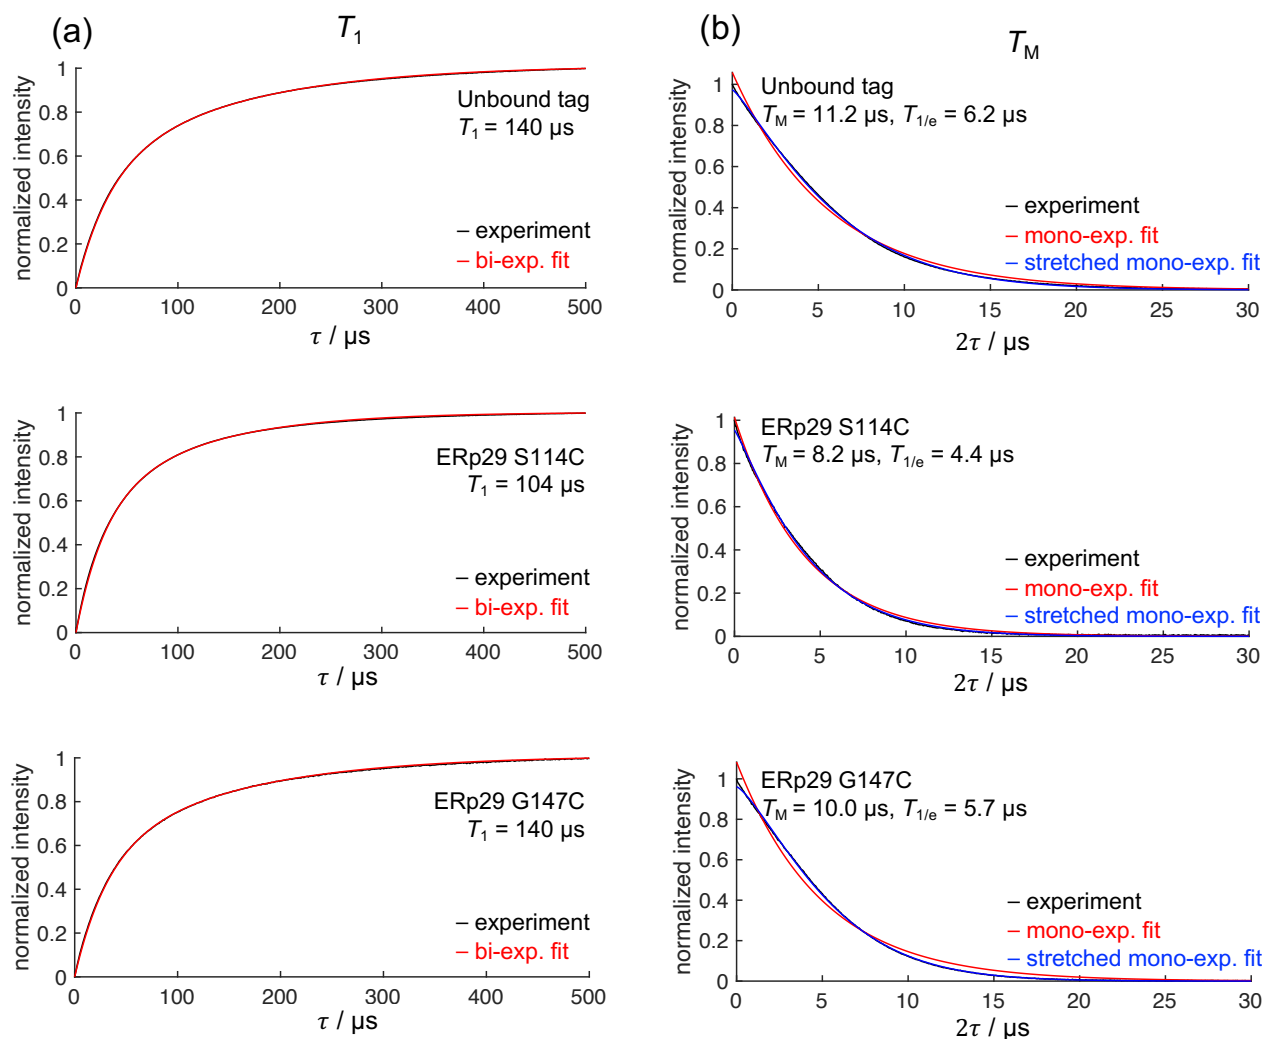

**Figure S18.** EPR characterisation of the **Gd.C12** tag, free and bound to ERp29 S114C and ERp29 G147C and associated fits. All fits were performed using a Levenberg–Marquardt least squares fitting in MATLAB. The modelled time constants are annotated in each figure. (a)  $T_1$  inversion recovery measurements (black) were fit with a biexponential decay function of the form  $[A\exp(-t/\tau_1) + B\exp(-t/\tau_2)]$  (red). (b) Spin-echo decay measurements of the phase memory time  $T_M$  (black) with corresponding mono-exponential fit of the data in red stretched function fit  $\exp[-(2t/\tau)^a]$  in blue. The  $T_{1/e}$  value is the time taken for the signal to reach  $1/e$  of its initial value, where  $T_M$  is close to  $2T_{1/e}$ .<sup>13</sup>

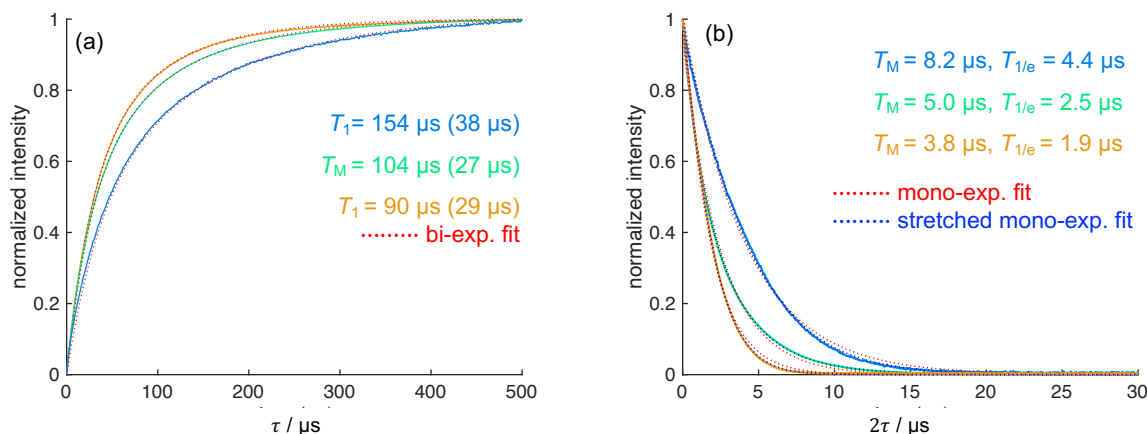

**Figure S19.** Inversion recovery (a) and spin-echo decay (b) time constants as a function of hydrogen–deuterium exchange. Samples of ERp29 S114C tagged with **Gd.C12** were buffer-exchanged into D<sub>2</sub>O at 4 °C as follows: 50 μL of the protein in H<sub>2</sub>O-based buffer was diluted 10-fold with D<sub>2</sub>O-based buffer and reconcentrated using an Amicon ultrafiltration device with a molecular weight cut-off of 10 kDa. This was repeated five times. The exchange protocol was completed within three hours and the sample frozen for EPR measurements (orange curve). Repeating the buffer exchange an additional five times yielded the EPR data shown in green. Leaving this sample in 1 mL deuterated buffer for an additional 24 hours at room temperature followed by 10 more buffer exchange steps yielded the blue curve. Based on these results, a simplified exchange protocol was used for ERp29 G147C tagged with **Gd.C12**, which was buffer-exchanged into D<sub>2</sub>O by 5 repeats of 10-fold dilution, followed by 24 hours incubation at room temperature. This sample yielded a spin-echo decay time constant of 8.2 μs. Bi/mono-exponential and stretched exponential decay fits for all three curves are shown using red and blue dotted traces respectively.

**Table S4.** Parameters used to fit the relaxation data of the **Gd.C12** tag.<sup>a</sup>

|             | $T_1 - \tau_1$ (μs) | $T_1 - \tau_2$ (μs) | $T_M$ (μs)<br>monoexp. | $T_M$ (μs) / stretch<br>factor $a$ | $T_{1/e}$<br>(μs) |
|-------------|---------------------|---------------------|------------------------|------------------------------------|-------------------|
| Unbound tag | 139.7               | 32.1                | 11.2                   | 12.5 / 1.21                        | 6.2               |
| ERp29 S114C | 104.2               | 27.4                | 8.2                    | 8.9 / 1.14                         | 4.4               |
| ERp29 G147C | 139.9               | 31.4                | 10.0                   | 11.7 / 1.33                        | 5.7               |

<sup>a</sup> The  $T_1$  relaxation data were fitted using the biexponential function  $[A\exp(-t/\tau_1) + B\exp(-t/\tau_2)]$ . The  $T_M$  relaxation time was fitted by the mono-exponential decay function  $\exp[-(2t/\tau)]$  and are compared against a stretched exponential decay fit  $\exp[-(2t/\tau)^a]$  in the subsequent column along with the  $T_{1/e}$  time in the last column.



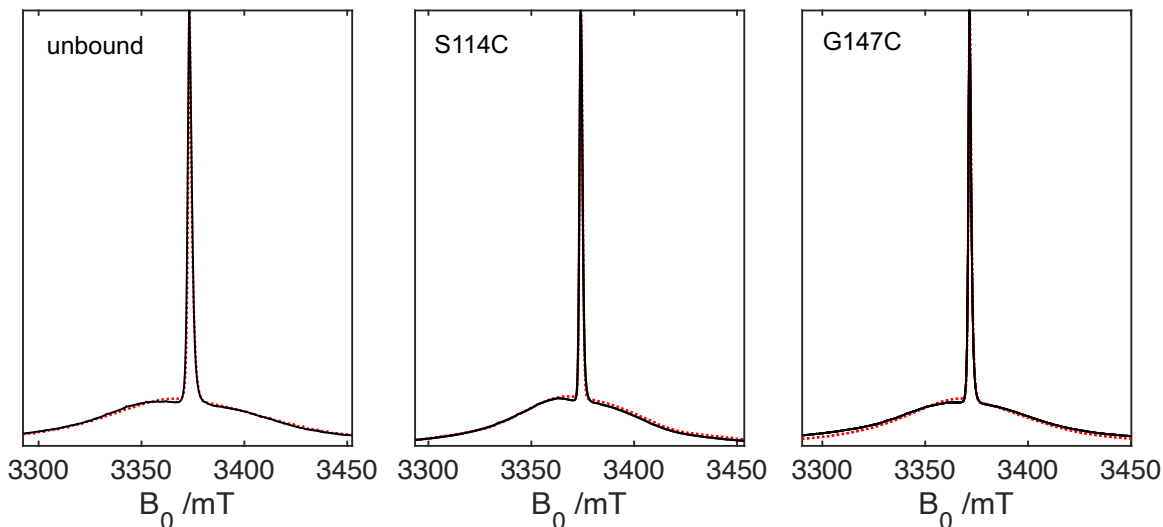

**Figure S20.** Lineshape fits of **Gd.C12**, unbound and bound to ERp29 S114C and ERp29 G147C, respectively. The experimental data are shown in black and simulated spectra are represented by the dotted red trace. The simulations were performed using the EasySpin *pepper* algorithm.<sup>14</sup> The fitting procedure employed the model by Clayton *et al.*,<sup>15</sup> which was based on the original description by Raitsimring *et al.*<sup>16</sup> of more accurate calculations for  $D$ -strains on the order of the ZFS tensor. The  $D$ -value distribution was modelled as a bimodal distributions centred about  $\pm|D|$  with width  $\sigma_D$  and weighting of the positive and negative peaks by a ratio of  $P^{D^+}/P^{D^-}$ . The  $E/D$  ratio was modelled by the polynomial  $P(E/D) = E/D - 2(E/D)^2$ . The fitting was performed as a Monte Carlo simulation, using randomly generated parameter sets ( $D$ ,  $\sigma_D$ ,  $P^{D^+}/P^{D^-}$  and  $E/D$ ) as starting points for the simulations, with the final spectrum calculated as a weighted sum according to the modelled  $D$  and  $E/D$  distributions. A finite linewidth ( $lw$ ) was included to model the central sharp feature. The fits shown are the lowest RMSD simulations with a sample size of 200, constraining the search parameters based on previously reported values for similar tags.<sup>15</sup>

**Table S5.** Parameters used to fit the line shape of the **Gd.C12** tag.

|             | $g$ -value | $ D $ /MHz | $\sigma_D$ /MHz | $P(D^+)/P(D^-)$ | $lw$ (mT) |
|-------------|------------|------------|-----------------|-----------------|-----------|
| Unbound tag | 1.9917     | 810.6      | 224.3           | 3.2             | 0.56      |
| ERp29 S114C | 1.9920     | 555.4      | 100.5           | 2.7             | 1.2       |
| ERp29 G147C | 1.9917     | 653.0      | 195.8           | 3.7             | 0.86      |
|             | $g$ value  | $ D $ /MHz | $\sigma_D$ /MHz | $P(D^+)/P(D^-)$ | $lw$ /mT  |
| Unbound tag | 1.9917     | 810.6      | 224.3           | 3.2             | 0.56      |
| ERp29 S114C | 1.9920     | 555.4      | 100.5           | 2.7             | 1.2       |

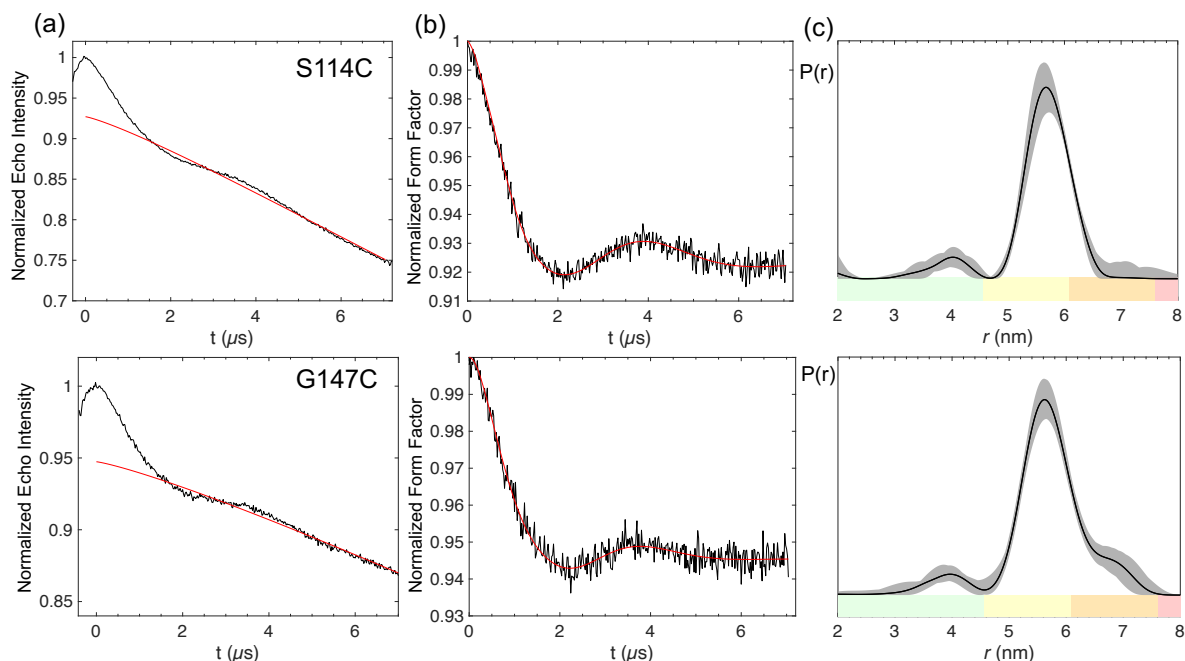

**Figure S21.** DEER experiments of ERp29 S114C (top panel) and ERp29 G147C (bottom panel) tagged with the **Gd.C12** tag. (a) Raw DEER data acquired in 19 h experiments. The red line shows the background fit, which is subtracted from the raw data to give the form factor in (b). The form factors in (b) are also shown in Figure 8a of the main text. (c) Distance distribution derived from the data in (b) using *DeerAnalysis2019*. Reliability ranges are identified by different colours: green - the shape of the distance distribution is reliable, yellow - the maximum of the distribution and its width are reliable, orange - the mean distance is reliable, red - long-range distances may be observable but cannot be quantified. The grey regions represent the uncertainty range of the data, indicating the range of alternative distributions obtained by varying the parameters of the background correction using the validation tool in the *DeerAnalysis2018* software package. Parameter ranges used for the validations: white noise 0–1.5, background start  $0.2 \cdot t_{\max} - 0.6 \cdot t_{\max}$ , background dimension 3.0, regularisation parameter 630.

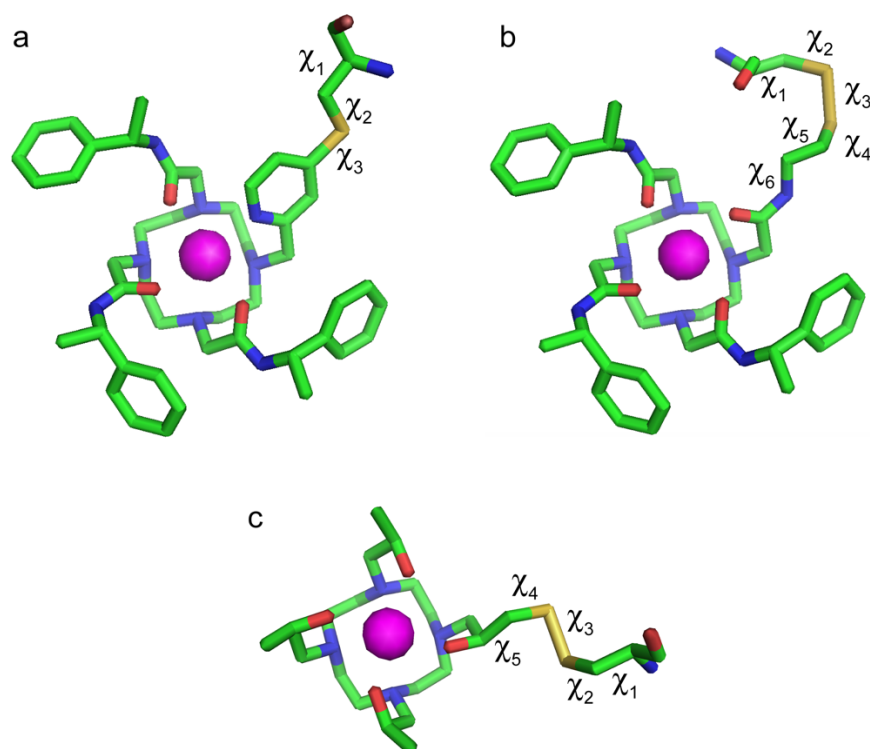

**Figure S22.** Tag structures and generation of rotamer libraries. The rotamer libraries were established by modeling the **C12**, **C1** and **C7** tags onto the crystal structure of human ERp29 (PDB 2QC7)<sup>17</sup> with the C-terminal domain removed to account for the flexibility of the linker between the N- and C-terminal domains.<sup>18</sup> The dihedral angles identified in the structures of parts a and b were varied in random combinations using the program PyParaTools. Conformations generating steric clashes with the protein were excluded. (a) Heavy-atom representation of a cysteine residue with the **Gd.C12** tag. The lanthanoid ion is indicated by a magenta sphere. The dihedral angles varied to create rotamer libraries are indicated. To generate the rotamer libraries, the dihedral angle  $\chi_1$  was allowed to vary by  $\pm 30^\circ$  around the staggered rotamers and  $\chi_2$  varied by  $\pm 30^\circ$  around the  $90^\circ$  and  $-90^\circ$  values, while the angle  $\chi_3$  was varied completely randomly. (b) Same as part a, but for the **Gd.C1** tag. The dihedral angle  $\chi_1$  was allowed to vary by  $\pm 30^\circ$  around the staggered rotamers,  $\chi_2$  varied by  $\pm 30^\circ$  around the  $90^\circ$  and  $-90^\circ$  values, and  $\chi_3$ ,  $\chi_4$ ,  $\chi_5$  and  $\chi_6$  were varied randomly. (c) Same as part a, but for the **Gd.C7** tag. The dihedral angles  $\chi_1$ – $\chi_5$  were varied as for the **Gd.C1** tag.

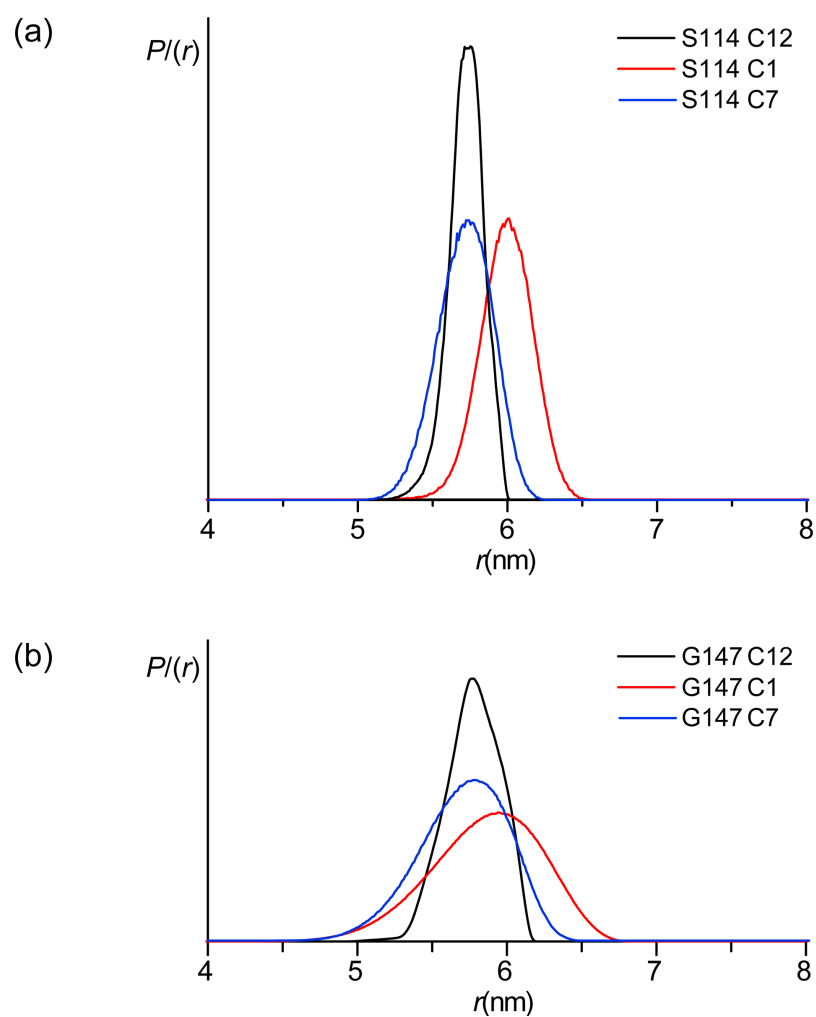

**Figure S23.**  $\text{Gd}^{3+}$ - $\text{Gd}^{3+}$  distance distributions calculated with the program PyParaTools using the rotamer libraries and angle variations described in Figure S22. (a) ERp29 S114C tagged with **Gd.C12** (black), **Gd.C1** (red) and **Gd.C7** (blue). (b) Same as part a, but for ERp29 G147C. Distance distributions calculated for **Gd.C8** (the enantiomer of **Gd.C7**) were practically indistinguishable from those of **Gd.C7**.

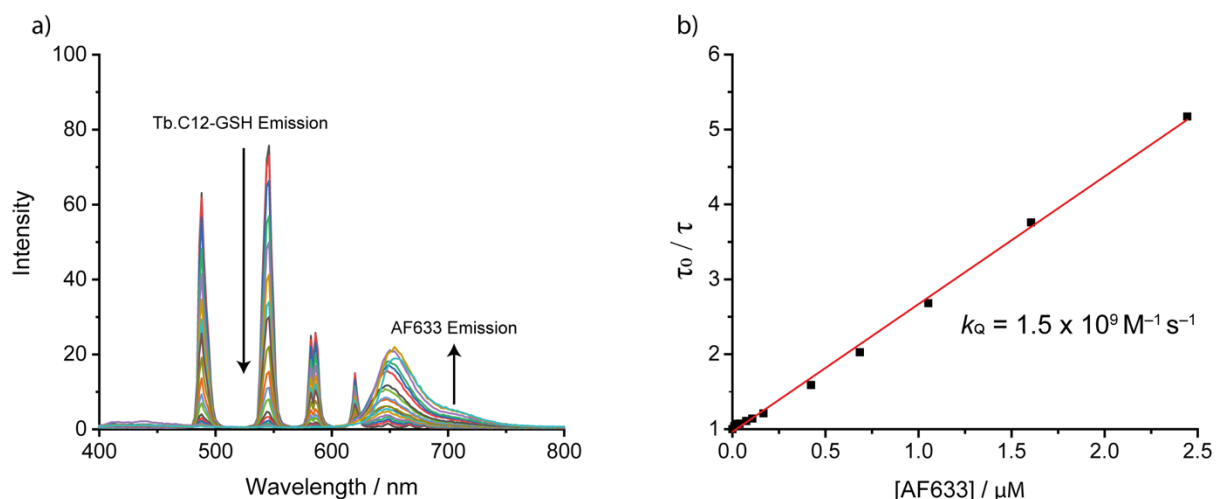

**Figure S24.** FRET between **Tb.C12-GSH** (donor) and freely diffusing AF633 (acceptor). (a) Decrease in emission intensity of **Tb.C12-GSH** (1  $\mu\text{M}$ ) and concomitant increase in AF633 emission intensity (centred at 650 nm) with increasing concentration of AF633 (0 – 2.5  $\mu\text{M}$ ), using  $\lambda_{\text{exc}} = 282 \text{ nm}$  and  $\lambda_{\text{em}} = 400 - 800 \text{ nm}$ . Data measured in 50 mM Tris-HCl, pH 7.4, 50 mM NaCl, 5% DMSO. (b) Stern-Volmer plot showing a linear increase in the  $\tau_0/\tau$  ratio (at 546 nm) with increasing AF633 concentration, according to the Stern-Volmer equation

$$\frac{\tau_0}{\tau} = 1 + k_Q \tau_0 [Q] \quad (3)$$

where  $\tau_0$  = emission lifetime in the absence of quencher (1109  $\mu\text{s}$ ),  $\tau$  = emission lifetime at given concentration of quencher,  $k_Q$  = quenching rate constant, Q = quencher (AF633).

Quenching of the Tb(III) emission in the presence of AF633 results in shortening of the emission lifetime,  $\tau$ . The quenching rate constant,  $k_Q = 1.5 \times 10^9 \text{ M}^{-1} \text{ s}^{-1}$ .

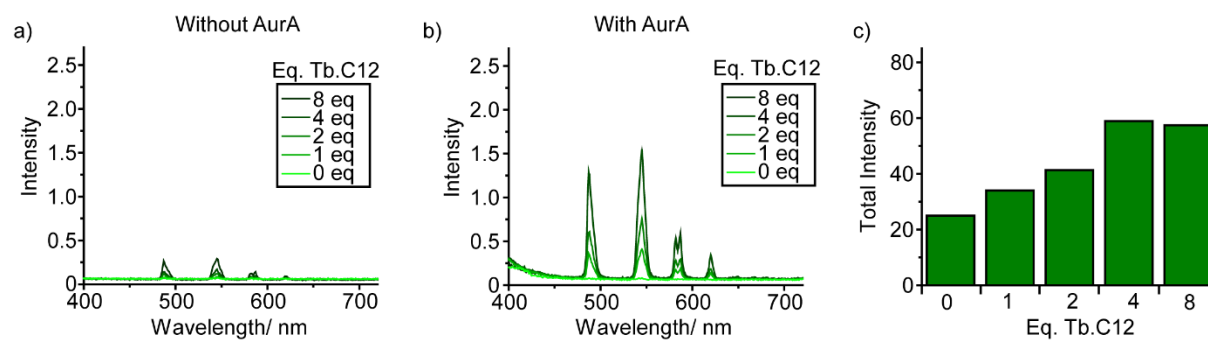

**Figure S25.** Emission spectra ( $\lambda_{\text{exc}} = 280 \text{ nm}$ ) after incubation of Aurora A with different equivalents of **Tb.C12**. Incubation was at 4 °C for 18 hours in 50 mM Tris-HCl, pH 7.4, 50 mM NaCl, 1.8% DMSO. (a) Control without Aurora A. (b) 15  $\mu\text{M}$  Aurora A. (c) Total emission intensity of the data in part b. The data suggest that quantitative tagging was achieved with 4 equivalents of **Tb.C12**.

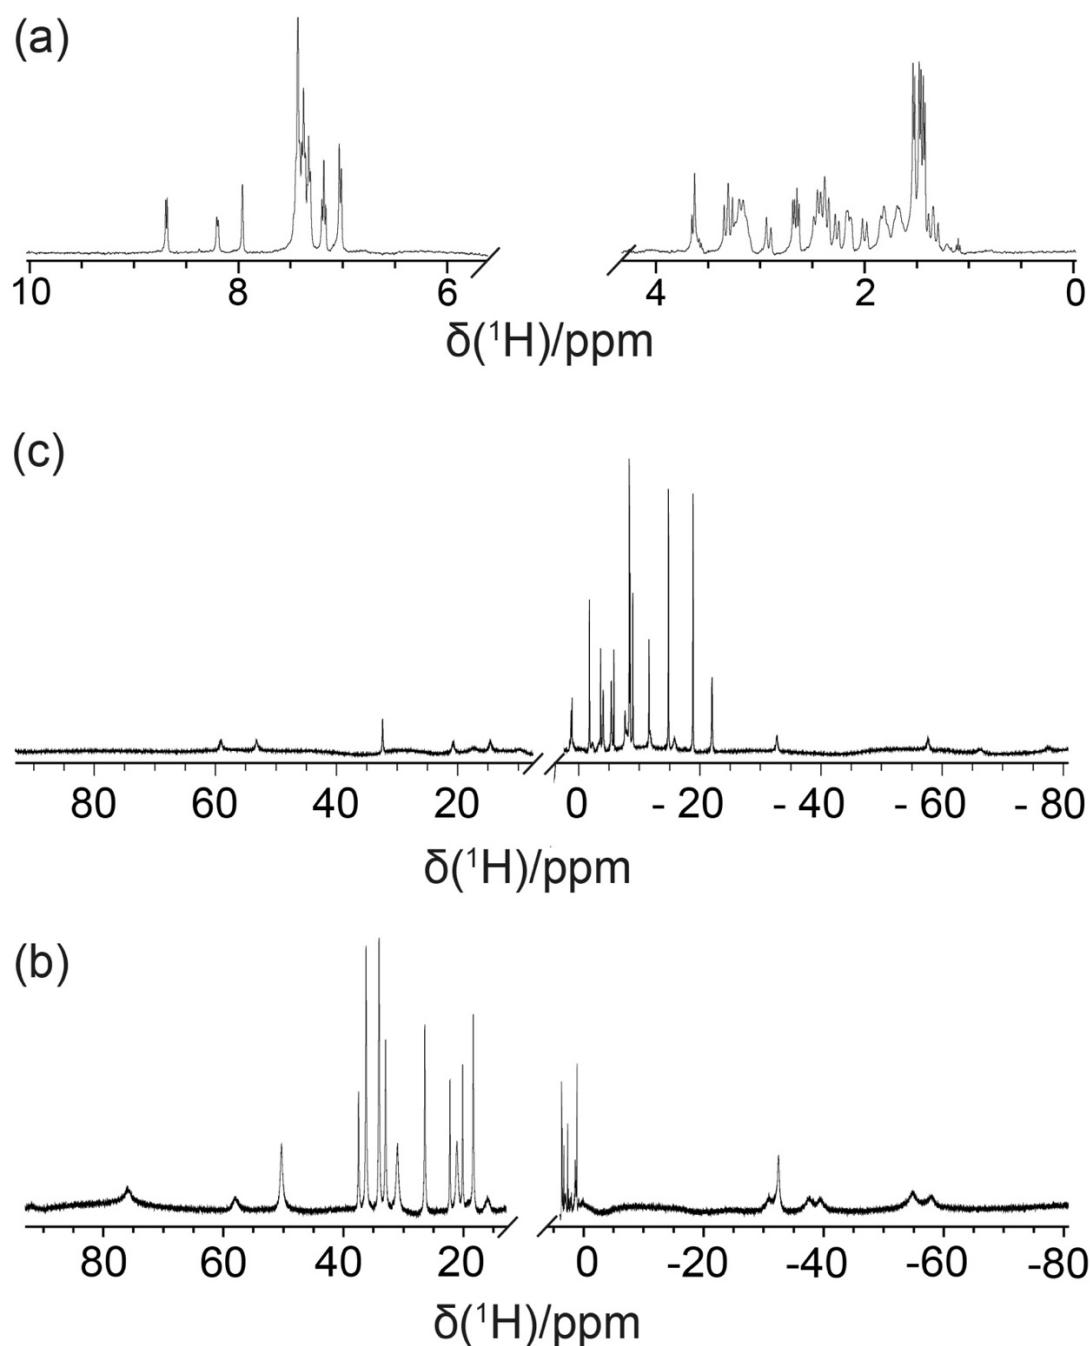

**Figure S26.** 1D  $^1\text{H}$  NMR spectra of the Ln.C12 tag complexed with either (a)  $\text{Y}^{3+}$ , (b)  $\text{Tm}^{3+}$  or (c)  $\text{Tb}^{3+}$ . The spectra were recorded in 95%  $\text{D}_2\text{O}/5\%$   $\text{H}_2\text{O}$  solution at 25 °C on a 400 MHz NMR spectrometer, using presaturation to suppress the residual HDO resonance. No solute signals were observable in the central regions omitted from the plots.

## References

1. K. L. Gempf, S. J. Butler, A. M. Funk and D. Parker, *Chem. Commun.* **2013**, *49*, 9104–9106.
2. L. de la Cruz, T. H. D. Nguyen, K. Ozawa, J. Shin, B. Graham, T. Huber and G. Otting, *J. Am. Chem. Soc.* **2011**, *133*, 19205–19215.
3. T. J. Carruthers, P. D. Carr, C.-T. Loh, C. J. Jackson and G. Otting, *Angew. Chem. Int. Ed.* **2014**, *53*, 14269–14272.
4. A. P. Welegedara, A. Maleckis, R. Bandara, M. C. Mahawaththa, I. D. Herath, Y. J. Tan, A. Giannoulis, D. Goldfarb, G. Otting and T. Huber, *ChemBioChem* **2020**, *22*, 1840–1848.
5. M. A. Apponyi, K. Ozawa, N. E. Dixon and G. Otting, in *Structural Proteomics: High-Throughput Methods*, eds. B. Kobe, M. Guss and T. Huber, Humana Press, Totowa, NJ, **2008**, pp. 257–268.
6. P. S. C. Wu, K. Ozawa, S. P. Lim, S. G. Vasudevan, N. E. Dixon and G. Otting, *Angew. Chem. Int. Ed.* **2007**, *46*, 3356–3358.
7. A.-M. Catanzariti, T. A. Soboleva, D. A. Jans, P. G. Board and R. T. Baker, *Protein Sci.* **2004**, *13*, 1331–1339.
8. C. A. Dodson and R. Bayliss, *J. Biol. Chem.* **2012**, *287*, 1150–1157.
9. C. A. Dodson, *Methods Mol. Biol.* **2017**, *1586*, 251–264.
10. B. J. G. Pearce, S. Jabar, C.-T. Loh, M. Szabo, B. Graham and G. Otting, *J. Biomol. NMR* **2017**, *68*, 19–32.
11. R. Bayliss, T. Sardon, I. Vernos and E. Conti, *Mol. Cell* **2003**, *12*, 851–862.
12. F. C. Rowan, M. Richards, R. A. Bibby, A. Thompson, R. Bayliss and J. Blagg, *ACS Chem. Biol.* **2013**, *8*, 2184–2191.
13. H. Yagi, D. Banerjee, B. Graham, T. Huber, D. Goldfarb and G. Otting, *J. Am. Chem. Soc.* **2011**, *133*, 10418–10421.
14. S. Stoll and A. Schweiger, *J. Magn. Reson.* **2006**, *178*, 42–55.
15. J. A. Clayton, K. Keller, M. Qi, J. Wegner, V. Koch, H. Hintz, A. Godt, S. Han, G. Jeschke, M. S. Sherwin and M. Yulikov, *Phys. Chem. Chem. Phys.* **2018**, *20*, 10470–10492.
16. A. M. Raitsimring, A. V. Astashkin, O. G. Poluektov and P. Caravan, *Appl. Magn. Reson.* **2005**, *28*, 281.



17. N. N. Barak, P. Neumann, M. Sevvana, M. Schutkowski, K. Naumann, M. Malešević, H. Reichardt, G. Fischer, M. T. Stubbs and D. M. Ferrari, *J. Mol. Biol.* **2009**, *385*, 1630–1642.
18. E. H. Abdelkader, M. D. Lee, A. Feintuch, M. R. Cohen, J. D. Swarbrick, G. Otting, B. Graham and D. Goldfarb, *J. Phys. Chem. Lett.* **2015**, *6*, 5016–5021.
